# Dynamics of genomic change during evolutionary rescue in the seed beetle *Callosobruchus maculatus*

Alexandre Rêgo<sup>1,2</sup>, Frank J. Messina<sup>1,2</sup>, Zachariah Gompert<sup>1,2\*</sup>

<sup>1</sup> Department of Biology, Utah State University, Logan, UT 84322, USA

<sup>2</sup> Ecology Center, Utah State University, Logan, UT 84322, USA

*Corresponding author:* Zachariah Gompert  
Department of Biology  
5305 Old Main Hill  
Utah State University  
Logan, UT 84322-5305  
Phone: (435) 797-9463  
Email: zach.gompert@usu.edu

**Article type:** Letter

**Running title:** Dynamics of evolutionary rescue

## 1 Abstract

2 Rapid adaptation can be necessary to prevent extinction when populations are exposed to ex-  
3 tremely marginal or stressful environments. Factors that affect the likelihood of evolutionary  
4 rescue from extinction have been identified, but much less is known about the evolutionary  
5 dynamics and genomic basis of successful evolutionary rescue, particularly in multicellular  
6 organisms. We conducted an evolve and resequence experiment to investigate the dynamics  
7 and repeatability of evolutionary rescue at the genetic level in the cowpea seed beetle, *Cal-*  
8 *losobruchus maculatus*, when it is experimentally shifted to a stressful host plant, lentil (*Lens*  
9 *culinaris*). Low survival ( $\sim 1\%$ ) at the onset of the experiment caused population decline.  
10 But adaptive evolution quickly rescued the population with survival rates climbing to 69%  
11 by the F5 generation and 90% by the F10 generation. Population genomic data showed that  
12 rescue likely was caused by rapid evolutionary change at multiple loci, with many alleles  
13 fixing or nearly fixing within five generations of selection on lentil. By comparing estimates  
14 of selection across five lentil-adapted *C. maculatus* populations (two new sublines and three  
15 long-established lines), we found that adaptation to lentil involves a mixture of parallel and  
16 idiosyncratic evolutionary changes. Parallelism was particularly pronounced in sublines that  
17 were formed after the parent line had passed through an initial bottleneck. Overall, our  
18 results suggest that evolutionary rescue in this system is driven by very strong selection on a  
19 modest number of loci, and these results provide empirical evidence that ecological dynamics  
20 during evolutionary rescue cause distinct evolutionary trajectories and genomic signatures  
21 relative to adaptation in less stressful environments.

22 **Keywords:** evolutionary rescue; experimental evolution; evolve and resequence;  
23 approximate Bayesian computation; *Callosobruchus maculatus*; parallel evolu-  
24 tion

## 25 Impact Statement

26 Evolutionary adaptation is an ongoing process in most populations, but when populations  
27 occupy particularly stressful or marginal environments, adaptation can be necessary to pre-  
28 vent extinction. Adaptation that reverses demographic decline and allows for population  
29 persistence is termed evolutionary rescue. Evolutionary rescue can prevent species loss from  
30 climate change or other environmental stresses, but it can also thwart attempts to control or  
31 eradicate agricultural pests and pathogens. Many factors affect the likelihood of evolutionary  
32 rescue, but little is known about the underlying evolutionary dynamics, particularly molec-  
33 ular evolutionary changes in multicellular organisms. Here we use a powerful combination  
34 of experimental evolution and genomics to track the evolutionary dynamics and genomic  
35 outcomes of evolutionary rescue. We focus on the seed beetle *Callosobruchus maculatus*,  
36 which is both an agricultural pest and a convenient model system. We specifically examine  
37 how this species is able to persist on a novel and very poor crop host, lentil.

38 We show that evolution in an experimental seed beetle populations increases sur-  
39 vival on lentil from  $\sim 1\%$  to  $>80\%$  in fewer than a dozen generations. This rapid adaptive  
40 evolutionary change at the trait (i.e., phenotypic) level was associated with equally rapid  
41 evolution at the molecular level, with some gene variants (i.e., alleles) showing frequency  
42 shifts of around 30% in a single generation. In contrast to most other experimental evolu-  
43 tion studies in multicellular organisms (particularly *Drosophila* fruit flies), we find that gene  
44 variants at multiple loci rapidly fix, that is, reach a frequency of 100%, during adaptation to  
45 lentil. Our results suggest that the dynamics and genetics of adaptation to severe conditions  
46 could be distinct from adaptation under more benign conditions. By comparing outcomes of  
47 adaptation across multiple lines and sublines, we show that repeated rapid adaptation at the  
48 trait level does not necessarily involve the same evolutionary changes at the molecular level.  
49 This limited parallelism was likely driven by extreme population bottlenecks caused by low  
50 survival in the early generations on lentil. Indeed, evolutionary changes in sublines formed

51 after recovery from a common bottleneck were highly parallel. This coupling of demographic  
52 (i.e., ecological) and evolutionary changes during evolutionary rescue may therefore limit the  
53 predictability of evolution. Because colonization of novel environments may often occur af-  
54 ter a bottleneck, our results could be of general significance for understanding patterns of  
55 parallel (and non-parallel) evolutionary change in nature.

## 56 Introduction

57 Decades of field and lab studies have overturned historical views of extreme evolutionary  
58 gradualism by showing that evolution can be rapid and relentless (e.g., Steinhauer and Hol-  
59 land, 1987; Grant and Grant, 2002; Thompson, 2013; Bergland et al., 2014; Elmer et al.,  
60 2014; Nosil et al., 2018). Evidence for rapid adaptive evolution is particularly common  
61 in human-altered environments (e.g., during adaptation to pesticides, antibiotics, or pollu-  
62 tion; Palumbi, 2001; Vonlanthen et al., 2012; Cook and Saccheri, 2013) or when adaptation is  
63 driven by interactions among species (e.g., resource competition, host-pathogen interactions,  
64 or predator-prey interactions; Yoshida et al., 2003; Stuart et al., 2014; Antonio-Nkondjio  
65 et al., 2015; Behrman et al., 2018). Rapid adaptive evolution may even be necessary to  
66 prevent sustained demographic decline and extinction when populations are exposed to ex-  
67 tremely marginal or stressful environments during a process known as evolutionary rescue  
68 (Gomulkiewicz and Holt, 1995; Bell and Gonzalez, 2009; Gonzalez et al., 2013; Lindsey et al.,  
69 2013; Orr and Unckless, 2014). Whereas most theory and experiments have focused on the  
70 probability of evolutionary rescue under different conditions (reviewed in Bell, 2017), much  
71 less is known about the evolutionary dynamics and genomic consequences of rescue when it  
72 occurs (but see Wilson et al., 2017).

73 Evolutionary rescue differs from other forms of adaptive evolution in a few key ways  
74 that could result in distinct evolutionary dynamics and genomic signals. First, evolutionary  
75 rescue necessarily couples ecological and evolutionary dynamics, because low absolute fitness  
76 in a deteriorating or stressful environment causes population decline that is then reversed  
77 when evolution leads to a sufficiently large increase in absolute fitness (Gomulkiewicz and  
78 Holt, 1995; Orr and Unckless, 2014). Second, compared to other cases of adaptive evolution,  
79 evolutionary rescue is more likely to occur via rapid adaptation in populations far from a  
80 phenotypic optimum (because population decline implies a poor fit to the current environ-  
81 ment). Thus, major effect genes could contribute disproportionately to evolutionary rescue

82 (McKenzie and Batterham, 1994; Orr, 2005). This prediction is supported by empirical  
83 evidence that major genes often drive the evolution of herbicide and insecticide resistance  
84 (French Constant et al., 2004; Kreiner et al., 2017). Additionally, recent theory suggests that  
85 evolutionary rescue is more likely when standing genetic variation is present, and may often  
86 involve soft selective sweeps in which multiple beneficial mutations increase in frequency  
87 simultaneously (Hermisson and Pennings, 2005; Bell, 2017; Wilson et al., 2017). Thus, sub-  
88 stantial genetic variation might be retained in a population throughout this process.

89       Because evolutionary rescue often involves rapid adaptation (e.g., Bell and Gonzala-  
90 lez, 2009; Bell, 2013; Vander Wal et al., 2013; Kreiner et al., 2017), cases of rescue could  
91 provide tractable opportunities to study the dynamics of adaptive alleles during a complete  
92 bout of adaptation, that is, from the onset of population decline to when a population has  
93 rebounded demographically. Such studies should also help determine whether instances of  
94 repeated ecological dynamics (e.g., population decline and recovery) are driven by repeat-  
95 able evolutionary dynamics, and thus whether eco-evolutionary dynamics are repeatable or  
96 predictable (Rudman et al., 2018). Whereas experimental studies have documented patterns  
97 of ecological and evolutionary change during rescue (e.g., Bell and Gonzalez, 2009; Gonzalez  
98 and Bell, 2013; Ramsayer et al., 2013; Killeen et al., 2017), such work has mostly focused on  
99 microorganisms (but see, e.g., Agashe, 2009; Agashe et al., 2011) and has rarely been com-  
100 bined with genetic or genomic data. Here, we conduct an evolve and resequence experiment  
101 to investigate the dynamics and repeatability of evolutionary rescue at the genetic level in the  
102 cowpea seed beetle, *Callosobruchus maculatus* (Chrysomelidae), when it is experimentally  
103 shifted to a marginal host plant, lentil (*Lens culinaris*, Fabaceae).

104       *Callosobruchus* beetles infest human stores of grain legumes. Females attach eggs to  
105 the surface of legume seeds. Upon hatching, larvae burrow into and develop within a single  
106 seed. Because *C. maculatus* has been associated with stored legumes for thousands of years,  
107 laboratory conditions are a good approximation of its "natural" environment (Tuda et al.,  
108 2014). Beetle populations mainly attack grain legumes in the tribe Phaseoleae, particularly

109 those in the genus *Vigna* (Tuda et al., 2006). Lentil (*L. culinaris*), a member of the tribe  
110 Fabaeae, is a poor host for most *C. maculatus* populations, as larval survival in seeds is  
111 typically <5% (Messina et al., 2009a). However, lentil is used as a host by a few unusual  
112 ecotypes (Credland, 1987, 1990). Previous attempts to establish laboratory populations on  
113 lentil have often resulted in extinction (Credland, 1987), but in a few cases experimental lines  
114 have rapidly adapted to lentil (Messina et al., 2009b). For example, in three experimental  
115 lines, survival rose to >80% within 20 generations, and these lines have now persisted on  
116 lentil for >100 generations (Messina et al., 2009b). Thus, evolutionary rescue appears to  
117 characterize this system.

118 In the current study, we established a new lentil-adapted line, which we then split  
119 into two sublines before evolutionary rescue was complete, i.e., after the population began to  
120 rebound from an initial bottleneck, but before it reached a performance plateau (Fig. 1). We  
121 sampled and sequenced beetles nearly every generation, and could thus characterize genome-  
122 wide evolutionary dynamics on a fine temporal scale. Our goal was not to identify specific  
123 genes that mediate evolutionary rescue, but rather to determine (i) whether rescue depends  
124 on a few or many genetic loci, (ii) whether selection on individual genetic loci is consistent  
125 throughout the process, and (iii) whether selection causes alleles to fix or instead causes  
126 more subtle shifts in allele frequencies (via partial/incomplete sweeps), as has been observed  
127 during other evolve and re-sequence experiments with multicellular organisms (e.g., Burke  
128 et al., 2010). Then, by comparing patterns of change between the two new sublines and across  
129 three independently derived lines, we ask (iv) to what extent the dynamics and outcomes  
130 of genome-wide allele frequency changes during evolutionary rescue are repeatable. We are  
131 particularly interested in whether the inevitable bottleneck that precedes rescue increases  
132 variation in subsequent evolutionary dynamics. Bottlenecks could precede adaptation even in  
133 more benign environments if new populations are derived from a modest number of founders  
134 (e.g., Baker and Moeed, 1987; Spurgin et al., 2014; Haileselasie et al., 2018).

## 135 **Methods**

### 136 **Study system, selection experiment and fitness assays**

137 Both the long-established lentil lines ( $\sim 100$  generations on lentil) and the new line produced  
138 for the current study were derived from the same base population of *C. maculatus* that was  
139 originally collected from southern India (Messina, 1991; Mitchell, 1991). This population had  
140 been continuously reared on mung bean, *Vigna radiata* (L.) Wilczek, for  $>300$  generations at  
141 the time we formed the new lentil line. Three lentil-adapted lines (L1-L3) were established  
142 as described by Messina et al. (2009a,b). Previous assays demonstrated that, for this Indian  
143 beetle population, initial survival to adult emergence is only 1-2% in lentil (Messina et al.,  
144 2009b; Messina and Jones, 2011). Consequently, there is always a severe initial bottleneck,  
145 and more than half of the attempts to produce a self-sustaining population on lentil seeds  
146 eventually fail (Messina et al., 2009a; Gompert and Messina, 2016). In the lines designated  
147 as L1-L3, survival increased rapidly over the course of only a few generations. Survival in  
148 these lines reached  $>60\%$  after only five generations, and  $>80\%$  in fewer than 20 generations  
149 (Messina et al., 2009a). At the same time, there were substantial decreases in development  
150 time and increases in body size. Genomic analyses of these lines did not commence until  
151 each had been maintained on lentil for 80-100 generations, and had reached a plateau with  
152 respect to performance on the novel host (Gompert and Messina, 2016). Hence, we were  
153 unable to capture the initial stages of adaptation.

154 We followed the same protocol to establish a new lentil line for genomic sampling  
155 in each successive generation (as described below). As expected, several initial attempts to  
156 produce a new lentil-adapted line eventually resulted in population extinction, but a single  
157 line (hereafter, L14) exhibited the rapid rise in survival previously observed in L1-L3 (see  
158 Results). This line was formed by adding  $>4000$  founding adults to 1500 g of lentil seeds  
159 (about 24,000 seeds). Most F1 offspring emerged 55–65 days after the founding adults were  
160 added. We transferred F1 beetles (approximately 100–200 individuals) to a new jar to form



161 the F2 generation.

162       Following the severe bottleneck in the initial generation on lentil, larval survival in  
163 seeds increased rapidly (as described below), so that we were able to use at least a few hun-  
164 dred beetles to form each successive generation. After five generations, the L14 population  
165 size was sufficiently high to implement standard culturing techniques, which involved trans-  
166 ferring >2000 beetles to a new batch of 750g lentil seeds each generation (see “Culturing and  
167 establishing lines” in the OSM). At the F5 generation, the L14 line was split into sublines  
168 A and B (Fig. 1a). By doing so, we could assess whether evolutionary dynamics after a  
169 shared bottleneck were more repeatable or parallel than were dynamics across independently  
170 derived lines (i.e., across the L1–L3 lines established earlier). Thus, while we have replica-  
171 tion in terms of the two sublines and our comparison with older lentil lines (L1–L3), we lack  
172 replication for evolutionary dynamics during the early stages of adaptation. Nonetheless,  
173 even a single instance of adaptation can provide important insights into how evolution can  
174 occur (e.g., Grant and Grant, 2002; Blount et al., 2008).

175       By the F5 generation, the population size of the L14 line was sufficiently high to apply  
176 our standard protocol for measuring survival in lentil from egg hatch to adult emergence  
177 (Messina et al., 2009a; Messina and Durham, 2015). We established a cohort of larvae in  
178 lentil seeds by first placing three pairs of newly emerged adults into each of 40 petri dishes  
179 containing about 100 lentil seeds. After 10-15 days, we collected a few seeds bearing a single  
180 hatched egg from each dish, and isolated each seed in a 4-ml vial. Vials were inspected  
181 daily for adult emergence until two weeks after the last adult had emerged. We collected  
182 a total of 224, 224, and 182 infested seeds for assays of the F5, F10, and F20 generations  
183 (Fig. 1b). For the F5 and F10 assays, we also measured survival in lentil in the ancestral,  
184 source population that had remained on mung bean. To reduce any effects of parental host,  
185 the L14 line was reverted back to mung bean for a generation (Messina et al., 2009a). Thus,  
186 parents of all test larvae had developed in mung bean. Survival probabilities were estimated  
187 using a Bayesian binomial model with an uninformative (Jefferys) beta prior on the survival

188 proportions (this model has an analytical solution, so exact posteriors are presented).

## 189 Genetic data

190 We sampled and isolated genomic DNA from 48 adult beetles per generation for the L14  
191 founders (the P generation) as well as for the F1-F4 generations. After L14 line was split  
192 into two sublines (A and B) we sampled beetles from subline A (L14A) at generations F5,  
193 F6, F7, F8 and F16, and from subline B (L14B) at generations F5, F8 and F16 (Fig. 1a). We  
194 generated partial genome sequences for these 624 *C. maculatus* beetles using our standard  
195 genotyping-by-sequencing approach (see “Our GBS approach” in the OSM; Gompert et al.,  
196 2012, 2014b). This approach provides a sample of SNPs distributed across the genome. We  
197 do not assume that the actual alleles responsible for lentil adaptation are included in this  
198 set of SNPs, but we do expect these data to include SNPs indirectly affected by selection  
199 on the causal genetic loci through linkage disequilibrium. Our genomic sampling scheme  
200 should thus provide a reasonable approximation for the evolutionary dynamics of the causal  
201 variants.

202 We used the `aln` and `samse` algorithms from `bwa` (ver. 0.7.10) (Li and Durbin, 2009)  
203 to align the 764 million  $\sim 86$  bp DNA sequences (after trimming barcodes) to a new draft  
204 genome assembly for *C. maculatus* (Fig. S1; see “*De novo* assembly of a *C. maculatus*  
205 genome” and “Alignment and variant calling” in the OSM for details). We then identified  
206 SNPs using the Bayesian multiallelic/rare variant caller from `samtools` (version 1.5) and  
207 `bcftools` (version 1.6) (implemented with the `-m` option in `bcftools call`). SNPs were  
208 subsequently filtered based on a variety of criteria, such as minimum mean coverage ( $\approx 2\times$   
209 per beetle) and mapping quality (30) (see the OSM for details). We retained 21,342 high-  
210 quality SNPs after filtering. Genetic data from the long-established lentil lines (L1, L2, and  
211 L3) were described in Gompert and Messina (2016). These samples were collected after 100  
212 (L1), 87 (L2) and 85 (L3) generations of evolution on lentil ( $N = 40$  individuals per line),  
213 and also include a reference sample from the source mung bean line collected at the same

214 time the lentil lines were sampled (M14,  $N = 48$ ). We aligned these data to our new genome  
215 assembly and called SNPs as described above but only considering the 21,342 SNPs already  
216 identified from the L14 data set. 18,637 of these SNPs were validated in the L1–L3 data set.

217 We used a hierarchical Bayesian model to estimate the allele frequencies for the 21,342  
218 SNPs in L14 at each sampled generation, and for the 18,637 SNPs in the L1, L2 and L3 data  
219 set (Gompert and Messina, 2016). This model jointly infers genotypes and allele frequen-  
220 cies while accounting for uncertainty in each due to finite sequence coverage and sequence  
221 errors, and thereby allows precise and accurate estimates of allele frequencies with low to  
222 moderate sequence coverage for individual beetles (see “Allele frequency model” in the OSM  
223 for details; Buerkle and Gompert, 2013). Allele frequency estimates were based on two  
224 Markov-chain Monte Carlo runs per sample (i.e., line by generation combination), with each  
225 consisting of a 5000 iteration burn-in and 15,000 sampling iterations with a thinning interval  
226 of 5. We then calculated the mean expected heterozygosity (across SNPs) and pairwise link-  
227 age disequilibrium among all pairs of SNPs each generation as summary metrics of genetic  
228 variation.

## 229 **Parameterizing and testing a null model of genetic drift**

230 We estimated the variance effective population size ( $N_e$ ) during the experiment from patterns  
231 of allele frequency change, and then used the estimates of  $N_e$  to parameterize and test a null  
232 model of evolution solely by genetic drift. We did this not as a formal test for selection,  
233 but rather to identify the set of SNPs that were most likely to have been affected, at least  
234 indirectly (i.e., through linkage disequilibrium), by selection. We estimated variance effective  
235 populations sizes as described in Gompert (2016) using a Bayesian bootstrap method (see  
236 “Bayesian bootstrap” in the OSM for details; Jorde and Ryman, 2007; Foll et al., 2015).  
237 Distinct estimates of  $N_e$  were obtained for the following generation intervals and (sub)lines:  
238 from L14 P to L14 F4, from L14 F4 to L14A F16, and from L14 F4 to L14B F16. We placed

239 a uniform prior on  $N_e$  (lower bound = 5, upper bound = 2000), and generated samples from  
240 the posterior distribution using 1000 bootstrap replicates.

241 We then asked whether the magnitude of allele frequency change for each SNP devi-  
242 ated from null expectations under a model of pure drift, given the estimated values of  $N_e$  (we  
243 used the posterior median for this). As with our estimates of  $N_e$ , we separately tested for  
244 deviations from neutrality for the following generation intervals and (sub)lines: from L14 to  
245 L14 F4, from L14 F4 to L14A F16, and from L14 F4 to L14B F16. We calculated the proba-  
246 bility of the observed allele frequency change from the start to end of each of these intervals  
247 based on a beta approximation to the basic Wright-Fisher model (Ewens, 2004). Specifically,  
248 we assumed  $p_t|p_0 \sim \text{beta}(\alpha + 0.001, \beta + 0.001)$ , where  $\alpha = p_0 \frac{1-F}{F}$ ,  $\beta = (1 - p_0) \frac{1-F}{F}$ ,  $p_0$  and  
249  $p_t$  are the allele frequencies at the beginning and end of the interval,  $F = 1 - (1 - \frac{1}{2N_e})^t$ ,  $t$   
250 is the number of generations between samples, and  $N_e$  is the variance effective population  
251 size. We retained SNPs with allele frequency changes more extreme than the 0.1th or 99.9th  
252 quantiles of the null distribution for any of the three time intervals for further analyses (Figs.  
253 S2, S3). We identified 198 SNPs (188 of which were variable in L1, L2 and L3) based on  
254 these relatively conservative criteria, and we hereafter focus primarily on the evolutionary  
255 dynamics at and effect of selection on these “focal” SNPs.

## 256 **Quantifying patterns of linkage disequilibrium over time**

257 To assess the potential for evolutionary independence among these focal loci, we calculated  
258 the squared correlation ( $r^2$ ) between genotypes for all pairs of the 198 SNPs as a metric of  
259 linkage disequilibrium (LD). Estimates of LD were made for each generation and (sub)line  
260 and were compared across generations. Hierarchical clustering and network-based methods  
261 were then used to identify and visualize groups or clusters of SNPs in high LD, with a  
262 focus on patterns of LD in L14-P, L14-F1, L14-F4, L14A-F16 and L14B-F16. We used the  
263 Ward agglomeration method implemented in the R `hclust` function for hierarchical clustering  
264 (from `fastcluster` version 1.1.24; Müllner et al., 2013). Clusters of high LD SNPs were

265 then delineated using the `cutreeDynamic` R function (version 1.63-1) with the cut height set  
266 to 99% of the truncated height range of the dendrogram (Langfelder et al., 2016). Next, we  
267 visualized patterns of LD using networks with each of the 198 SNPs denoted by a node and  
268 edges connecting SNPs in high LD. To do this, we created an adjacency matrix from each  
269 LD matrix. SNPs were considered adjacent, that is connected in the network, when the  $r^2$   
270 metric of LD was 0.25 or greater; this cut-off corresponds with the 97.5th quantile of the  
271 empirical LD distribution for the focal SNPs in L14 P. The R package `igraph` (version 1.2.1)  
272 was used to construct and visualize these networks (Csardi and Nepusz, 2006).

## 273 **Estimating selection**

274 We estimated the selection experienced by each of the 198 SNPs in L14 from generation P  
275 to F4, and then in each subline from generation F4 to F16. These estimates, including their  
276 consistency between earlier (up to F4) and later (from F4 to F16) stages of evolutionary res-  
277 cue (i.e., adaptation to lentil) were used as our primary process-based metric of evolutionary  
278 dynamics (patterns of LD and allele frequency changes themselves provided pattern-based  
279 metrics of evolutionary dynamics). Selection coefficients were also estimated in the long-  
280 established lentil lines (L1-L3) for the subset of these SNPs (188 of 198) that were variable  
281 in these lines. Comparisons of selection coefficients across lines, sublines, and time periods  
282 allowed us to assess the consistency and repeatability of genomic changes associated with  
283 adaptation to lentil in *C. maculatus*.

284 We used approximate Bayesian computation (ABC) to fit Wright-Fisher models with  
285 selection and thereby estimate selection coefficients for each SNP in each (sub)line and time  
286 period (Ewens, 2004; Gompert and Messina, 2016). Here, we first describe the general  
287 approach and specific details for the L14 data analysis, and then discuss modifications for  
288 the long-established lentil lines. We assumed that marginal relative fitness values for the  
289 three genotypes at each locus were given by  $w_{11} = 1 + s$ ,  $w_{12} = 1 + hs$ , and  $w_{22} = 1$ , where  $s$   
290 is the selection coefficient,  $h$  is the heterozygote effect, and 1 and 2 denote the reference and

291 non-reference allele, respectively. Critically,  $s$  reflects the combined effects of indirect and  
292 (possibly) direct selection on each SNP. That is, it includes the effect of selection transmitted  
293 to a SNP because of LD with one or more causal variants (Gompert et al., 2014a; Egan et al.,  
294 2015; Gompert et al., 2017).

295 With our ABC approach, we first sampled values of  $s$  and  $h$  from their prior distri-  
296 butions and then simulated evolution forward in time from the parental generation of L14 to  
297 generation F16 in sublines A and B while allowing for genetic drift (which was parameterized  
298 by the relevant estimate of  $N_e$ ) and selection (this combines equation 1.24 from Ewens, 2004  
299 with binomial sampling for genetic drift). Our primary interest was in estimating  $s$ , but we  
300 included  $h$  as a free parameter to account for the effect of uncertainty in  $h$  on inference of  $s$ ,  
301 and to extract any information available from the data on  $h$ . We considered three models,  
302 (i) a fully constrained model with constant  $s$  (and  $h$ ) over time and across sublines, (ii) a  
303 partially constrained model that allowed  $s$  and  $h$  to change at the F4 generation but with  
304 identical selection in both sublines, and (iii) an unconstrained model with *a priori* inde-  
305 pendent values of  $s$  and  $h$  prior to the subline split and in each subline after the split. We  
306 assigned a prior probability of  $\frac{1}{3}$  to each model. Simulation output comprised the full vector  
307 of allele frequencies across generations and sublines, which we then compared to the anal-  
308 ogous allele frequency vector containing the observed data for each locus. As is standard  
309 with ABC methods, posterior distributions for  $s$  and  $h$  were generated by retaining (and  
310 correcting, see below) the set of parameter values that best recreated the observed allele  
311 frequency vector.

312 We based inferences of  $s$  and  $h$  for each of the 198 SNPs on five million simula-  
313 tions. The non-reference allele frequency for each SNP in the L14 founder generation (P)  
314 was used to initialize each simulation. We retained the sampled parameter values from the  
315 0.02% of simulations (1000 samples) that generated allele frequency vectors with the smallest  
316 Euclidean distance to the observed allele frequency vector (across lines, sublines and gener-  
317 ations). We then corrected these sampled parameter values by adjusting them towards the

318 true posterior distribution using a weighted local linear regression (Beaumont et al., 2002).  
319 This was done with the `abc` function in the R `abc` package (version 2.1) (Csilléry et al., 2012).  
320 Model posterior probabilities were calculated using a simple rejection method, and posterior  
321 probabilities of  $s$  and  $h$  integrated over uncertainty in the best model except where noted  
322 otherwise. Simulations were used to assess the precision and accuracy of selection coefficient  
323 estimates with our ABC framework (see “Evaluation of the ABC approach” and Figs. S4  
324 and S5 in the OSM)

325 We modified the method described above to obtain inferences for  $s$  in the L1, L2 and  
326 L3 lines. First, since the mung-bean source line was sampled contemporaneously with the  
327 long-established lentil lines rather than at the point in time when the lentil lines were founded,  
328 we first simulated evolution by genetic drift backwards in time (from M14 to the founding  
329 population of each lentil line) to obtain a starting value for forward-in-time simulations  
330 of evolution by selection and drift in each lentil line (see “The ABC model” in the OSM  
331 and Gompert and Messina, 2016 for additional details). Variance effective population sizes  
332 from Gompert and Messina (2016) were used for these simulations. Values of  $s$  and  $h$  were  
333 sampled from their prior distributions and the 0.02% of simulations that best matched the  
334 observed data were retained as described for L14, but in this case we compared only the  
335 final allele frequency in L1 F100, L2 F87 and L3 F85 with the simulated value after 100,  
336 87 or 85 generations of evolution (we lack genetic data from the early stages of adaptation  
337 in these lines). Because this constraint greatly reduced the dimensionality of the summary  
338 statistics, many simulations gave exact matches to the observed data. This result caused the  
339 local linear regression to fail, but also made such an analysis unnecessary. Hence, we used  
340 simple rejection to obtain the posterior distributions of  $s$  for L1, L2 and L3.

341 Estimates of  $s$  were designated as credibly different from zero when the 95% equal-  
342 tail probability intervals (ETPIs) of the relevant posterior distribution did not overlap zero.  
343 Cases where this was not true do not constitute evidence of neutral evolution, but rather  
344 indicate that we cannot confidently distinguish among three possibilities: neutral evolu-

345 tion, selection favoring the non-reference allele, and selection favoring the reference allele.  
346 Comparisons of selection coefficients across lines, sublines or time intervals were made by  
347 calculating Pearson correlation coefficients ( $r$ ). Rather than basing these calculations on  
348 the point estimates of  $s$ , we obtained posterior distributions for  $r$  by integrating over uncer-  
349 tainty in  $s$  (i.e., by calculating  $r$  for each posterior sample of  $s$ ). Thus, uncertainty in  $s$  was  
350 propagated to downstream summary analyses.

## 351 Results

### 352 Fitness assays

353 Survival from egg hatch to adult emergence from lentil seeds was low as expected in the  
354 source mung bean population ( $\sim 1\%$ ) (Fig. 1). Yet survival had risen to 69.2% by the F5  
355 generation. Subsequent to the subline split, survival assays were only conducted in subline  
356 A. At generation F10, survival had further increased to 90.2%, and remained high (91.8%) at  
357 the F20 generation (Fig. 1). This pattern of rapid adaptation thus resembled those observed  
358 earlier in the L1-L3 lines.

### 359 Patterns of allele frequency change and LD in L14

360 We observed substantial evolutionary change over the course of the experiment, with an  
361 average net allele frequency change between generations P and F16 of 0.155 in subline A  
362 (SD = 0.150) and 0.159 in subline B (SD = 0.155). Average expected heterozygosity also  
363 declined over time, from 0.274 in generation P to 0.246 in generation F4, and finally to  
364 0.222 (subline A) or 0.220 (subline B) in the F16 generation. Consistent with the observed  
365 decline in diversity and census population bottleneck, the variance effective population size  
366 was quite low initially ( $\hat{N}_e$  for P to F4 = 8.82, 95% credible intervals [CIs] = 8.60–9.04;  
367 Table 1). Variance effective population sizes then increased between generations F4 and F16



368 to 68.92 (95% CIs = 66.69–71.05) and 56.77 (95% CIs = 55.25–58.35) in sublines A and  
369 B, respectively. Even in the parental generation, LD was high between nearby SNPs ( $\bar{r}^2 =$   
370 0.369 for SNPs <100 bp apart), and modest out to 500 kb ( $\bar{r}^2 = 0.152$ ) (Table S1, Fig. S6).  
371 On average, LD increased over the course of the experiment, although the upper quantiles  
372 of the LD distribution reached their maximum by the F4 generation before declining in both  
373 sublines.

374 Considerably greater evolutionary change was observed for the 198 SNPs with sig-  
375 nificant deviations from the null genetic drift model (i.e., the focal SNPs). For these SNPs,  
376 the average net allele frequency change over the experiment (from P to F16) was 0.611 in  
377 subline A (range = 0.004–0.973) and 0.616 in subline B (range = 0.018–0.980) (Figs. 2,  
378 S7). Many of these SNPs exhibited substantial allele frequency change in a single genera-  
379 tion, with an mean (across SNPs), maximum single-generation change of 0.446 (range across  
380 SNPs = 0.175–0.7451). For 70.7% of these SNPs the maximum change occurred between  
381 the F2 and F3 generation (the mean absolute change for this generation was 0.370). By  
382 the F16 generation, the initially rarer allele (i.e., the minor allele) had reached a frequency  
383 of > 0.90 at 64.1% of these SNPs, and > 0.98 for 29.2% (subline A) or 22.2% (subline  
384 B) of them. Frequency changes during the first four generations were only modestly cor-  
385 related with changes after the formation of the the two sublines ( $r_{P-F4,F4-F16A} = 0.125$ ,  
386  $r_{P-F4,F4-F16B} = 0.240$ ), whereas evolutionary changes were more parallel between sublines  
387 after the split ( $r_{F4-F16A,F4-F16B} = 0.744$ , Fig. S8).

388 The 198 focal SNPs did not evolve independently, but instead were organized into  
389 clusters of high LD loci that exhibited similar patterns of allele frequency change (Figs. 2, 3,  
390 S9). We identified 16 and 10 clusters of high LD SNPs in the L14–P and L14–F1, respectively,  
391 which were reorganized into six high LD clusters by the F4 generation. LD within clusters  
392 was considerably higher than LD between clusters (e.g., mean  $r^2$  within,  $r_W^2 = 0.209$ , versus  
393 mean among,  $r_B^2 = 0.023$  in L14–F4; Fig. 3). Despite the fragmented nature of our reference  
394 genome (Fig. S1), we found that cluster membership was consistent with physical proximity,

395 such that SNPs on the same scaffold were more likely to be assigned to the same cluster ( $p <$   
396  $0.001$  based on a randomization test in L14–F1). With that said, patterns of LD and cluster  
397 membership shifted over the experiment, particularly during the first four generations (Fig.  
398 3b), such that pairwise LD in generations F1 and F4 were only modestly correlated ( $r_{F1,F4}$   
399  $= 0.199$ ). Patterns of LD changed less after that; the correlations in pairwise LD between  
400 F4 and L14A–F16 and L14B–F16 were  $r_{F4,F16A} = 0.605$  and  $r_{F4,F16B} = 0.569$ , respectively.

### 401 **Strength and consistency of natural selection**

402 For most SNPs, constrained and unconstrained models had similar posterior probabilities  
403 (Fig. S10). Consequently, rather than focusing on a specific model, we report model-averaged  
404 selection coefficients. Consistent with the observed patterns of allele frequency change,  
405 selection coefficients were large on average, especially during the early stages of adaptation  
406 (i.e., from L14–P to L14–F4) (as expected, allele frequency change and estimates of selection  
407 were strongly correlated, with  $r > 0.8$ ; Fig. S11). In particular, the average intensity of  
408 selection was 0.388 in L14 from P to F4, and 0.207 and 0.211 in sublines A and B between  
409 the F4 and F16 generations (Fig. 4; see Figs. S12, S13, S14, S15, S16 and S17 and text in  
410 the OSM for results using different priors). Of these 198 SNPs, we detected a credible effect  
411 of selection (that is, 95% ETPIs for  $s$  not overlapping zero) in 53 SNPs from six of ten LD  
412 clusters during the early phase of adaptation (from P to F4), and 53 and 51 SNPs from  
413 four of ten LD clusters during the later stage of adaptation (F4–F16) in sublines A and B,  
414 respectively (here we define LD clusters based on patterns of LD in L14–F1). Estimates of  
415  $h$  were associated with considerable uncertainty, but there was a slight signal of an overall  
416 negative correlation between  $s$  and  $h$  (see “Heterozygous effect”, Table S3 and Figs. S18 and  
417 S19 in the OSM for details).

418 Only five and seven SNPs had credible effects of selection during both time periods for  
419 sublines A and B, respectively (Fig. 5a,b). Nevertheless, estimates of  $s$  during early (between  
420 P and F4) and late (from F4 to F16) adaptation were moderately correlated ( $r_{P-F4,F4-F16A} =$

421 0.489,  $r_{P-F4, F4-F16B} = 0.499$ ) (Table S4). Moreover, we never detected credible effects  
422 of selection with opposite signs between time periods. We obtained similar results when  
423 we based our inferences only on the fully unconstrained model (see “Sensitivity to model  
424 assumptions” and Figs. S17 and S20 and Table S5 in the OSM for details). We detected  
425 much greater consistency in estimates of  $s$  during the later stages of adaptation in the two  
426 sublines ( $r_{F4-F16A, F4-F16B} = 0.857$ ; Fig. 5c). Forty SNPs had credible effects of  $s$  in both  
427 sublines, and always with the same sign.

428 On average, estimates of  $s$  were lower for the long-established lentil lines with means  
429 of 0.067, 0.103 and 0.022 in L1, L2 and L3, respectively. Lower estimates of  $s$  are expected,  
430 as patterns of change were averaged over longer periods of time (this effect is evident in  
431 Gompert and Messina, 2016) and similar numbers of SNPs had values of  $s$  credibly different  
432 from zero (43 in L1, 55 in L2, and 10 in L3). Correlations in selection coefficients among  
433 the three long-established lines were considerably lower, ranging from 0.094 to 0.262 (Fig 6).  
434 There was an even weaker association between selection in the L14 line (and sublines) and  
435 any of the long-established lentil lines, with correlations ranging from -0.024 to 0.050 (Table  
436 S4).

## 437 Discussion

438 Using an evolve and resequence approach, we have shown that evolutionary rescue in *C.*  
439 *maculatus* on lentil occurred via rapid evolutionary changes at multiple loci. We found  
440 evidence of very strong selection on these loci (e.g.,  $\bar{s} > 0.3$  during the first four generations),  
441 consistent with the observed rapid increase in survival and rapid fixation or near fixation  
442 of initially rare alleles. Our results also suggest that semi-independent loci are involved in  
443 the very early stages of adaptation versus the later stages. Comparisons across (sub)lines  
444 indicated that evolutionary rescue occurred via a mixture of repeatable and idiosyncratic  
445 evolutionary changes. However, extreme parallelism was observed in sublines that were

446 formed after the population recovered from an initial bottleneck. Hence, the repeatability  
447 of evolutionary rescue at the molecular level could depend on demographic factors early in  
448 the process of decline and recovery. We discuss these findings and their caveats below.

## 449 **The genetic architecture and evolutionary dynamics of rescue**

450 Survival rates on lentil increased from less than 1% to over 90% in just 10 generations.  
451 During this time, the new lentil line (L14) went through a severe bottleneck with the variance  
452 effective population size ( $N_e$ ) dropping to fewer than 10 individuals before rebounding. Our  
453 results suggest that this demographic rebound was driven by adaptive evolutionary changes  
454 involving several to a dozen major causal loci. Specifically, we found evidence that very  
455 strong (indirect) selection drove evolutionary change at >100 SNP markers, which were  
456 organized into 4–12 high LD clusters. We hypothesize that each cluster comprises SNPs in  
457 LD with one or more distinct causal variants. If we are correct, our results suggest that  
458 rapid adaptation to lentil was driven by strong selection on oligogenic variation (consistent  
459 with Orr, 2005 and Bell and Gonzalez, 2009), similar to adaptation to freshwater in marine  
460 sticklebacks (Jones et al., 2012; Lescak et al., 2015). These results are consistent with theory  
461 predicting a greater role for major effect loci (and fewer total genes) during the early stages  
462 of adaptation, particularly when a population is far from a phenotypic optimum. Such  
463 circumstances may be common in cases of evolutionary rescue (Orr, 2005; Bell, 2017).

464 At more than 100 SNPs, the minor allele reached a frequency >90% within 16 gen-  
465 erations (and in some cases within five generations). While we lack data on the underlying  
466 causal variants, we can assume that such variants evolved at least this rapidly during the  
467 same time period, as direct selection on a causal variant should generally exceed indirect  
468 selection on a marker locus in LD with that variant. We interpret this result as strong  
469 evidence that selection on standing genetic variation fixed or nearly fixed alleles (or haplo-  
470 types) at many of these causal loci. Thus, our results differ from other recent evolve and  
471 resequence experiments in eukaryotes (mostly *Drosophila*) where adaptation occurred by

472 more subtle shifts in allele frequencies and incomplete selective sweeps (Burke et al., 2010;  
473 Orozco-terWengel et al., 2012; Burke et al., 2014; Tobler et al., 2014; Graves Jr et al., 2017).  
474 These different genomic outcomes likely reflect the fact that mean absolute fitness in the  
475 Indian *C. maculatus* population on lentil is initially extremely low. Thus, unlike in the  
476 aforementioned *Drosophila* experiments, selection likely continued to favor the same alleles  
477 until they reached fixation.

478 We found evidence of very strong selection on individual loci during this experiment,  
479 with average selection coefficients on the set of 198 focal loci ranging from 0.207 to 0.388  
480 (depending on the subline and time interval). Although this magnitude of selection is much  
481 stronger than is commonly assumed in population-genetic theory, it is consistent with strong  
482 selection detected in other systems, such as sticklebacks (Barrett et al., 2008), phlox (Hopkins  
483 and Rausher, 2012), flies (Cardoso-Moreira et al., 2016) and stick insects (Gompert et al.,  
484 2014a; Nosil et al., 2018), as well as with the observed rapid rise in survival of *C. maculatus*  
485 on lentil. Thus, our work further highlights the importance of developing a more mature  
486 population-genetic theory of strong selection and rapid adaptation, especially in populations  
487 that colonize stressful novel environments (e.g., Gompert, 2016; Messer et al., 2016).

488 Despite the constant host environment during the experiment, selection on individual  
489 loci varied across generations, particularly in terms of the magnitude (but not direction) of  
490 selection. Several complementary explanations may account for this observation. First,  
491 given the observed patterns of allele frequency change at the SNP markers, some causal  
492 variants likely fixed or nearly fixed within the first five generations. After this, selection  
493 on these variants would have ceased, thereby reducing or eliminating selection on linked  
494 SNP markers. Second, epistatic interactions could have altered the marginal fitness effects  
495 of causal variants as allele frequencies changed. Epistatic interactions have previously been  
496 shown to play an important role in adaptation in several species, including mice (Steiner  
497 et al., 2007), yeast (Ono et al., 2017), and bacteria (Arnold et al., 2018). Third, direct  
498 selection on causal variants could be constant, but indirect selection on our SNP markers

499 could shift as allele frequencies and LD evolve. Given the major shifts we see in patterns  
500 of LD, this is almost certainly part of the reason for the variable strength of selection over  
501 time. Lastly, some sources of selection could be density dependent. Male-male competition  
502 is common in high-density populations of *C. maculatus* (Hotzy and Arnqvist, 2009), and the  
503 Indian source population has particularly pronounced intraspecific competition at the larval  
504 stage (Messina, 1991; Fox and Messina, 2018).

## 505 **Repeatability of evolutionary rescue**

506 At the phenotypic level, the rapid rate of adaptation to lentil in the new L14 line closely  
507 matched that observed in earlier successful experimental host shifts to lentil (Messina et al.,  
508 2009b). Evidence for parallelism at the genetic level was less consistent. Specifically, we  
509 observed extreme parallelism in terms of allele frequency change and selection coefficients  
510 for the focal SNPs when comparing the two L14 sublines, but less parallelism was observed  
511 among the three long-established lentil lines (L1–L3) (consistent with Gompert and Messina,  
512 2016), and there was little to no evidence of parallel evolutionary change between L14 and  
513 L1, L2, or L3. We think much of this variation in parallelism stems from differences in shared  
514 genetic variation available for selection across these cases (as has also been seen in evolve and  
515 resequence studies in *Drosophila*; Seabra et al., 2017). This hypothesis is further supported  
516 by the limited phenotypic and genetic parallelism that we observed in reversion lines derived  
517 from L1, L2 and L3 (Gompert and Messina, 2016; Messina and Gompert, 2017).

518 Perhaps most important, because lentil is a very stressful host, each lentil line went  
519 through a severe bottleneck when it was founded (Gompert and Messina, 2016). Thus, the  
520 subset of adaptive genetic variation (or adaptive gene combinations) available for selection in  
521 each line was likely quite different (e.g., Charlesworth, 2009; Tinghitella et al., 2011), which  
522 necessarily limits parallelism at the genetic level. In contrast, the two L14 sublines were  
523 split after they had begun to recover from a shared bottleneck, and likely shared a much  
524 greater proportion of adaptive alleles. Thus, our results suggest that bottlenecks associated

525 with colonizing a new (and possibly stressful) environment (e.g., host) could put limits on  
526 parallel evolution.

527 In addition, evolutionary changes within the source mung bean line have likely altered  
528 the standing genetic variation initially available for adaptation to lentil in each line. Given  
529 the modestly high variance effective population size in this source line ( $N_e = 1149$ ; Gompert  
530 and Messina, 2016) and the fact that the population has been kept on the same host for  
531  $>1000$  generations, we expected minimal evolution within this line, but yet it is clearly still  
532 evolving. L2 and L3 were formed within just a few generations of each other, and L1 was  
533 started about 20 generations before that (Messina et al., 2009b; Gompert and Messina, 2016).  
534 Consequently, these lines, and particularly L2 and L3, which show the greatest parallelism,  
535 had much of the same genetic variation available, at least before each bottleneck. L14 was  
536 formed more than 100 generations later, after much more time had passed for the source  
537 population to have evolved in meaningful ways (e.g., for rare alleles adaptive on lentil to  
538 have been lost). Taken together, our results suggest that demographic history can be a key  
539 determinant of the extent of parallel evolution at the genetic level, and that bottlenecks  
540 could decrease parallelism in cases of evolutionary rescue.

## 541 **Conclusions**

542 We documented rapid adaptation to a stressful host by seed beetles, and showed that it  
543 was associated with exceptionally rapid evolutionary change at numerous loci. This result  
544 does not mean that all (or any) of the focal SNPs drove adaptation to lentil. Rather, these  
545 SNPs were in LD clusters associated with the actual causal variants and thus indirectly  
546 affected by selection. Our approach differs in some respects from most evolve and resequence  
547 experiments (e.g., Burke et al., 2010; Orozco-terWengel et al., 2012; Tobler et al., 2014;  
548 Graves Jr et al., 2017). By foregoing the expenses associated with whole-genome sequencing  
549 (the standard approach), we were able to obtain (partial) genome sequence data that were  
550 tied to individual seed beetles and were also able to sample nearly every generation during

551 adaptation. These individual-level data were critical for confidently measuring LD among the  
552 focal SNPs. Moreover, without the fine-scale temporal sampling, we likely would have missed  
553 most of the dynamics of adaptation. The latter constraint might not be a problem in systems  
554 where adaptation occurs more slowly, but it is hard to know the pace of adaptation without  
555 good temporal resolution. Thus, our results suggest a need for additional evolutionary studies  
556 with fine-scale temporal sampling.

557 Our results also suggest that understanding the repeatability/predictability of evo-  
558 lution might require considering both ecological (e.g., demographic) and evolutionary pro-  
559 cesses. We suggest that demographic events such as bottlenecks receive too little attention  
560 in some areas of evolutionary biology. For example, with increased attention on ecological  
561 speciation (Nosil, 2012), that is, with a greater focus on the nature and consequences of di-  
562 vergent selection in speciation, the contribution of demographic processes to speciation has  
563 perhaps been deemphasized. However, ecological speciation could often exhibit dynamics  
564 similar to what we observed here if it is initiated when a population colonizes a marginal  
565 environment. Thus, we suspect better integration of eco-evolutionary thinking throughout  
566 evolutionary biology (which is already underway, e.g., Hendry, 2016) will be very productive.

## 567 **Acknowledgments**

568 This manuscript was improved by comments on earlier drafts by J. Fordyce, L. Lucas, C.  
569 Nice, P. Nosil, T. Saley, and A. Springer. We thank C. Bourgeois, S. Thelen, and C. Willden  
570 for technical assistance. This research was supported by the Utah Agricultural Experiment  
571 Station, Utah State University (UAES paper number 9119). The support and resources  
572 from the Center for High Performance Computing at the University of Utah are gratefully  
573 acknowledged.



## 574 **Author Contributions**

575 ZG and FJM conceived and designed the study. FJM ran the selection experiment. ZG  
576 generated the DNA sequence data. AR and ZG analyzed the data. ZG and AR drafted the  
577 initial version of the manuscript and authors contributed to later versions of the manuscript.

## 578 **Data Accessibility**

579 DNA sequence will be archived in the NCBI SRA (accession numbers pending). Other data  
580 and computer code used to analyze these data will be archived in DRYAD.

## 581 **Literature Cited**

582 Agashe, D., 2009. The stabilizing effect of intraspecific genetic variation on population  
583 dynamics in novel and ancestral habitats. *The American Naturalist* 174:255–267.

584 Agashe, D., J. J. Falk, and D. I. Bolnick, 2011. Effects of founding genetic variation on  
585 adaptation to a novel resource. *Evolution* 65:2481–2491.

586 Antonio-Nkondjio, C., B. T. Fossog, E. Kopya, Y. Poumachu, B. M. Djantio, C. Ndo,  
587 T. Tchuinkam, P. Awono-Ambene, and C. S. Wondji, 2015. Rapid evolution of pyrethroid  
588 resistance prevalence in *Anopheles gambiae* populations from the cities of Douala and  
589 Yaoundé (Cameroon). *Malaria Journal* 14:155.

590 Arnold, B. J., M. U. Gutmann, Y. H. Grad, S. K. Sheppard, J. Corander, M. Lipsitch,  
591 and W. P. Hanage, 2018. Weak epistasis may drive adaptation in recombining bacteria.  
592 *Genetics* P. 300662.

593 Baker, A. J. and A. Moeed, 1987. Rapid genetic differentiation and founder effect in colo-  
594 nizing populations of common mynas (*Acridotheres tristis*). *Evolution* 41:525–538.

- 595 Barrett, R. D., S. M. Rogers, and D. Schluter, 2008. Natural selection on a major armor  
596 gene in threespine stickleback. *Science* 322:255–257.
- 597 Beaumont, M. A., W. Zhang, and D. J. Balding, 2002. Approximate bayesian computation  
598 in population genetics. *Genetics* 162:2025–2035.
- 599 Behrman, E. L., V. M. Howick, M. Kapun, F. Staubach, A. O. Bergland, D. A. Petrov, B. P.  
600 Lazzaro, and P. S. Schmidt, 2018. Rapid seasonal evolution in innate immunity of wild  
601 *Drosophila melanogaster*. *Proc. R. Soc. B* 285:20172599.
- 602 Bell, G., 2013. Evolutionary rescue and the limits of adaptation. *Philosophical Transactions*  
603 *of the Royal Society B* 368:20120080.
- 604 ———, 2017. Evolutionary rescue. *Annual Review of Ecology, Evolution, and Systematics*  
605 48:605–627.
- 606 Bell, G. and A. Gonzalez, 2009. Evolutionary rescue can prevent extinction following envi-  
607 ronmental change. *Ecology Letters* 12:942–948.
- 608 Bergland, A. O., E. L. Behrman, K. R. O’Brien, P. S. Schmidt, and D. A. Petrov, 2014.  
609 Genomic evidence of rapid and stable adaptive oscillations over seasonal time scales in  
610 *Drosophila*. *PLoS Genetics* 10:e1004775.
- 611 Blount, Z. D., C. Z. Borland, and R. E. Lenski, 2008. Historical contingency and the evolution  
612 of a key innovation in an experimental population of *Escherichia coli*. *Proceedings of the*  
613 *National Academy of Sciences* 105:7899–7906.
- 614 Buerkle, C. A. and Z. Gompert, 2013. Population genomics based on low coverage sequencing:  
615 how low should we go? *Molecular Ecology* 22:3028–3035.
- 616 Burke, M. K., J. P. Dunham, P. Shahrestani, K. R. Thornton, M. R. Rose, and A. D. Long,  
617 2010. Genome-wide analysis of a long-term evolution experiment with drosophila. *Nature*  
618 467:587–590.

- 619 Burke, M. K., G. Liti, and A. D. Long, 2014. Standing genetic variation drives repeatable  
620 experimental evolution in outcrossing populations of *Saccharomyces cerevisiae*. *Molecular*  
621 *Biology and Evolution* 31:3228–3239.
- 622 Cardoso-Moreira, M., J. R. Arguello, S. Gottipati, L. G. Harshman, J. K. Grenier, and  
623 A. G. Clark, 2016. Evidence for the fixation of gene duplications by positive selection in  
624 *Drosophila*. *Genome Research* 26:787–798.
- 625 Charlesworth, B., 2009. Effective population size and patterns of molecular evolution and  
626 variation. *Nature Reviews Genetics* 10:195–205.
- 627 French Constant, R. H., P. J. Daborn, and G. L. Goff, 2004. The genetics and genomics of  
628 insecticide resistance. *Trends in Genetics* 20:163 – 170.
- 629 Cook, L. and I. Saccheri, 2013. The peppered moth and industrial melanism: evolution of a  
630 natural selection case study. *Heredity* 110:207.
- 631 Credland, P. F., 1987. Effects of host change on the fecundity and development of an un-  
632 usual strain of *Callosobruchus maculatus* (F.)(Coleoptera: Bruchidae). *Journal of Stored*  
633 *Products Research* 23:91–98.
- 634 ———, 1990. Biotype variation and host change in bruchids: causes and effects in the  
635 evolution of bruchid pests. Pp. 271–287, *in* *Bruchids and Legumes: Economics, Ecology*  
636 *and Coevolution*. Springer.
- 637 Csardi, G. and T. Nepusz, 2006. The igraph software package for complex network research.  
638 *InterJournal Complex Systems*:1695.
- 639 Csilléry, K., O. François, and M. G. Blum, 2012. abc: an R package for approximate bayesian  
640 computation (ABC). *Methods in Ecology and Evolution* 3:475–479.
- 641 Egan, S. P., G. J. Ragland, L. Assour, T. H. Powell, G. R. Hood, S. Emrich, P. Nosil, and

- 642 J. L. Feder, 2015. Experimental evidence of genome-wide impact of ecological selection  
643 during early stages of speciation-with-gene-flow. *Ecology Letters* 18:817–825.
- 644 Elmer, K. R., S. Fan, H. Kusche, M. L. Spreitzer, A. F. Kautt, P. Franchini, and A. Meyer,  
645 2014. Parallel evolution of Nicaraguan crater lake cichlid fishes via non-parallel routes.  
646 *Nature Communications* 5:5168.
- 647 Ewens, W. J., 2004. *Mathematical population genetics: i theoretical introduction* .
- 648 Foll, M., H. Shim, and J. D. Jensen, 2015. Wfab: a wright–fisher abc-based approach  
649 for inferring effective population sizes and selection coefficients from time-sampled data.  
650 *Molecular Ecology Resources* 15:87–98.
- 651 Fox, C. and F. Messina, 2018. Evolution of larval competitiveness and associated life-history  
652 traits in response to host shifts in a seed beetle. *Journal of Evolutionary Biology* 31:302–  
653 313.
- 654 Gnerre, S., I. MacCallum, D. Przybylski, F. J. Ribeiro, J. N. Burton, B. J. Walker, T. Sharpe,  
655 G. Hall, T. P. Shea, S. Sykes, et al., 2011. High-quality draft assemblies of mammalian  
656 genomes from massively parallel sequence data. *Proceedings of the National Academy of*  
657 *Sciences* 108:1513–1518.
- 658 Gompert, Z., 2016. Bayesian inference of selection in a heterogeneous environment from  
659 genetic time-series data. *Molecular Ecology* 25:121–134.
- 660 Gompert, Z., A. A. Comeault, T. E. Farkas, J. L. Feder, T. L. Parchman, C. A. Buerkle,  
661 and P. Nosil, 2014a. Experimental evidence for ecological selection on genome variation  
662 in the wild. *Ecology Letters* 17:369–379.
- 663 Gompert, Z., S. P. Egan, R. D. Barrett, J. L. Feder, and P. Nosil, 2017. Multilocus approaches  
664 for the measurement of selection on correlated genetic loci. *Molecular Ecology* 26:365–382.

- 665 Gompert, Z., L. K. Lucas, C. A. Buerkle, M. L. Forister, J. A. Fordyce, and C. C. Nice,  
666 2014b. Admixture and the organization of genetic diversity in a butterfly species complex  
667 revealed through common and rare genetic variants. *Molecular Ecology* 23:4555–4573.
- 668 Gompert, Z., L. K. Lucas, C. C. Nice, J. A. Fordyce, M. L. Forister, and C. A. Buerkle, 2012.  
669 Genomic regions with a history of divergent selection affect fitness of hybrids between two  
670 butterfly species. *Evolution* 66:2167–2181.
- 671 Gompert, Z. and F. J. Messina, 2016. Genomic evidence that resource-based trade-offs limit  
672 host-range expansion in a seed beetle. *Evolution* 70:1249–1264.
- 673 Gomulkiewicz, R. and R. D. Holt, 1995. When does evolution by natural selection prevent  
674 extinction? *Evolution* 49:201–207.
- 675 Gonzalez, A. and G. Bell, 2013. Evolutionary rescue and adaptation to abrupt environmental  
676 change depends upon the history of stress. *Philosophical Transactions of the Royal Society*  
677 *B* 368:20120079.
- 678 Gonzalez, A., O. Ronce, R. Ferriere, and M. E. Hochberg, 2013. Evolutionary rescue: an  
679 emerging focus at the intersection between ecology and evolution. *Philosophical Transac-*  
680 *tions of the Royal Society of London B: Biological Sciences* 368.
- 681 Gough, B., 2009. GNU Scientific Library Reference Manual - Third Edition. 3rd ed. Network  
682 Theory Ltd.
- 683 Grant, P. R. and B. R. Grant, 2002. Unpredictable evolution in a 30-year study of darwin's  
684 finches. *Science* 296:707–711.
- 685 Graves Jr, J., K. Hertweck, M. Phillips, M. Han, L. Cabral, T. Barter, L. Greer, M. Burke,  
686 L. Mueller, and M. Rose, 2017. Genomics of parallel experimental evolution in *Drosophila*.  
687 *Molecular Biology and Evolution* 34:831–842.

- 688 Haileselesie, T. H., J. Mergeay, J. Vanoverbeke, L. Orsini, and L. De Meester, 2018. Founder  
689 effects determine the genetic structure of the water flea *Daphnia* in Ethiopian reservoirs.  
690 *Limnology and Oceanography* 63:915–926.
- 691 Hendry, A. P., 2016. *Eco-evolutionary dynamics*. Princeton university press.
- 692 Hermisson, J. and P. S. Pennings, 2005. Soft sweeps: molecular population genetics of  
693 adaptation from standing genetic variation. *Genetics* 169:2335–2352.
- 694 Hopkins, R. and M. D. Rausher, 2012. Pollinator-mediated selection on flower color allele  
695 drives reinforcement. *Science* 335:1090–1092.
- 696 Hotzy, C. and G. Arnqvist, 2009. Sperm competition favors harmful males in seed beetles.  
697 *Current Biology* 19:404–407.
- 698 Jones, F. C., M. G. Grabherr, Y. F. Chan, P. Russell, E. Mauceli, J. Johnson, R. Swofford,  
699 M. Pirun, M. C. Zody, S. White, et al., 2012. The genomic basis of adaptive evolution in  
700 threespine sticklebacks. *Nature* 484:55.
- 701 Jorde, P. E. and N. Ryman, 2007. Unbiased estimator for genetic drift and effective popu-  
702 lation size. *Genetics* 177:927–935.
- 703 Killeen, J., C. Gougat-Barbera, S. Krennek, and O. Kaltz, 2017. Evolutionary rescue and local  
704 adaptation under different rates of temperature increase: a combined analysis of changes  
705 in phenotype expression and genotype frequency in *Paramecium* microcosms. *Molecular*  
706 *Ecology* 26:1734–1746.
- 707 Kreiner, J. M., J. R. Stinchcombe, and S. I. Wright, 2017. Population genomics of herbicide  
708 resistance: Adaptation via evolutionary rescue. *Annual Review of Plant Biology* 69:611–  
709 635.
- 710 Langfelder, P., B. Zhang, and S. Horvath, 2016. *dynamicTreeCut*: Methods for Detection of

- 711 Clusters in Hierarchical Clustering Dendrograms. URL [https://CRAN.R-project.org/](https://CRAN.R-project.org/package=dynamicTreeCut)  
712 `package=dynamicTreeCut`. R package version 1.63-1.
- 713 Lescak, E. A., S. L. Bassham, J. Catchen, O. Gelmond, M. L. Sherbick, F. A. von Hippel, and  
714 W. A. Cresko, 2015. Evolution of stickleback in 50 years on earthquake-uplifted islands.  
715 *Proceedings of the National Academy of Sciences* 112:E7204–E7212.
- 716 Li, H., 2011. A statistical framework for snp calling, mutation discovery, association map-  
717 ping and population genetical parameter estimation from sequencing data. *Bioinformatics*  
718 27:2987–2993.
- 719 Li, H. and R. Durbin, 2009. Fast and accurate short read alignment with burrows–wheeler  
720 transform. *Bioinformatics* 25:1754–1760.
- 721 Lindsey, H. A., J. Gallie, S. Taylor, and B. Kerr, 2013. Evolutionary rescue from extinction  
722 is contingent on a lower rate of environmental change. *Nature* 494:463.
- 723 McKenzie, J. A. and P. Batterham, 1994. The genetic, molecular and phenotypic conse-  
724 quences of selection for insecticide resistance. *Trends in Ecology & Evolution* 9:166–169.
- 725 Messer, P. W., S. P. Ellner, and N. G. Hairston Jr, 2016. Can population genetics adapt to  
726 rapid evolution? *Trends in Genetics* 32:408–418.
- 727 Messina, F. J., 1991. Life-history variation in a seed beetle: adult egg-laying vs. larval  
728 competitive ability. *Oecologia* 85:447–455.
- 729 Messina, F. J. and S. L. Durham, 2015. Loss of adaptation following reversion suggests  
730 trade-offs in host use by a seed beetle. *Journal of Evolutionary Biology* 28:1882–1891.
- 731 Messina, F. J. and Z. Gompert, 2017. Evolution of host acceptance and its reversibility in a  
732 seed beetle. *Ecological Entomology* 42:42–50.

- 733 Messina, F. J. and J. C. Jones, 2011. Inheritance of traits mediating a major host shift by a  
734 seed beetle, *Callosobruchus maculatus* (Coleoptera: Chrysomelidae: Bruchinae). *Annals*  
735 *of the Entomological Society of America* 104:808–815.
- 736 Messina, F. J., J. C. Jones, M. Mendenhall, and A. Muller, 2009a. Genetic modification  
737 of host acceptance by a seed beetle, *Callosobruchus maculatus* (Coleoptera: Bruchidae).  
738 *Annals of the Entomological Society of America* 102:181–188.
- 739 Messina, F. J., M. Mendenhall, and J. C. Jones, 2009b. An experimentally induced host  
740 shift in a seed beetle. *Entomologia Experimentalis et Applicata* 132:39–49.
- 741 Mitchell, R., 1991. The traits of a biotype of *Callosobruchus maculatus* (F.) (Coleoptera:  
742 Bruchidae) from South India. *Journal of Stored Products Research* 27:221–224.
- 743 Müllner, D. et al., 2013. fastcluster: Fast hierarchical, agglomerative clustering routines for  
744 R and Python. *Journal of Statistical Software* 53:1–18.
- 745 Nosil, P., 2012. *Ecological speciation*. Oxford University Press.
- 746 Nosil, P., R. Villoutreix, C. F. de Carvalho, T. E. Farkas, V. Soria-Carrasco, J. L. Feder,  
747 B. J. Crespi, and Z. Gompert, 2018. Natural selection and the predictability of evolution  
748 in *Timema* stick insects. *Science* 359:765–770.
- 749 Ono, J., A. C. Gerstein, and S. P. Otto, 2017. Widespread genetic incompatibilities between  
750 first-step mutations during parallel adaptation of *Saccharomyces cerevisiae* to a common  
751 environment. *PLoS Biology* 15:e1002591.
- 752 Orozco-terWengel, P., M. Kapun, V. Nolte, R. Kofler, T. Flatt, and C. Schlötterer, 2012.  
753 Adaptation of *Drosophila* to a novel laboratory environment reveals temporally heteroge-  
754 neous trajectories of selected alleles. *Molecular Ecology* 21:4931–4941.
- 755 Orr, H. A., 2005. The genetic theory of adaptation: a brief history. *Nature Reviews Genetics*  
756 6:119.



- 757 Orr, H. A. and R. L. Unckless, 2014. The population genetics of evolutionary rescue. PLoS  
758 Genetics 10:e1004551.
- 759 Palumbi, S. R., 2001. Humans as the world's greatest evolutionary force. Science 293:1786–  
760 1790.
- 761 Ramsayer, J., O. Kaltz, and M. E. Hochberg, 2013. Evolutionary rescue in populations of  
762 *Pseudomonas fluorescens* across an antibiotic gradient. Evolutionary Applications 6:608–  
763 616.
- 764 Rudman, S. M., M. A. Barbour, K. Csilléry, P. Gienapp, F. Guillaume, N. G. Hairston Jr,  
765 A. P. Hendry, J. R. Lasky, M. Rafajlović, K. Räsänen, et al., 2018. What genomic data  
766 can reveal about eco-evolutionary dynamics. Nature Ecology & Evolution 2:9.
- 767 Seabra, S. G., I. Fragata, M. A. Antunes, G. S. Faria, M. A. Santos, V. C. Sousa, P. Simoes,  
768 and M. Matos, 2017. Different genomic changes underlie adaptive evolution in populations  
769 of contrasting history. Molecular Biology and Evolution 35:549–563.
- 770 Spurgin, L. G., J. C. Illera, T. H. Jorgensen, D. A. Dawson, and D. S. Richardson, 2014.  
771 Genetic and phenotypic divergence in an island bird: isolation by distance, by colonization  
772 or by adaptation? Molecular Ecology 23:1028–1039.
- 773 Steiner, C. C., J. N. Weber, and H. E. Hoekstra, 2007. Adaptive variation in beach mice  
774 produced by two interacting pigmentation genes. PLoS Biology 5:e219.
- 775 Steinhauer, D. and J. Holland, 1987. Rapid evolution of RNA viruses. Annual Reviews in  
776 Microbiology 41:409–431.
- 777 Stuart, Y. E., T. Campbell, P. Hohenlohe, R. G. Reynolds, L. Revell, and J. Losos, 2014.  
778 Rapid evolution of a native species following invasion by a congener. Science 346:463–466.
- 779 Thompson, J. N., 2013. Relentless evolution. University of Chicago Press.

- 780 Tinghitella, R., M. Zuk, M. Beveridge, and L. Simmons, 2011. Island hopping introduces  
781 polynesian field crickets to novel environments, genetic bottlenecks and rapid evolution.  
782 *Journal of Evolutionary Biology* 24:1199–1211.
- 783 Tobler, R., S. U. Franssen, R. Kofler, P. Orozco-terWengel, V. Nolte, J. Hermisson, and  
784 C. Schlötterer, 2014. Massive habitat-specific genomic response in *D. melanogaster* pop-  
785 ulations during experimental evolution in hot and cold environments. *Molecular Biology*  
786 *and Evolution* 31:364–375.
- 787 Tuda, M., K. Kagoshima, Y. Toquenaga, and G. Arnqvist, 2014. Global genetic differenti-  
788 ation in a cosmopolitan pest of stored beans: effects of geography, host-plant usage and  
789 anthropogenic factors. *PLoS One* 9:e106268.
- 790 Tuda, M., J. Rönn, S. Buranapanichpan, N. Wasano, and G. Arnqvist, 2006. Evolutionary  
791 diversification of the bean beetle genus *Callosobruchus* (Coleoptera: Bruchidae): traits  
792 associated with stored-product pest status. *Molecular Ecology* 15:3541–3551.
- 793 Vander Wal, E., D. Garant, M. Festa-Bianchet, and F. Pelletier, 2013. Evolutionary rescue  
794 in vertebrates: evidence, applications and uncertainty. *Philosophical Transactions of the*  
795 *Royal Society B* 368:20120090.
- 796 Vonlanthen, P., D. Bittner, A. G. Hudson, K. A. Young, R. Müller, B. Lundsgaard-Hansen,  
797 D. Roy, S. Di Piazza, C. R. Largiadèr, and O. Seehausen, 2012. Eutrophication causes  
798 speciation reversal in whitefish adaptive radiations. *Nature* 482:357.
- 799 Wilson, B. A., P. S. Pennings, and D. A. Petrov, 2017. Soft selective sweeps in evolutionary  
800 rescue. *Genetics* 205:1573–1586.
- 801 Yoshida, T., L. E. Jones, S. P. Ellner, G. F. Fussmann, and N. G. Hairston Jr, 2003. Rapid  
802 evolution drives ecological dynamics in a predator–prey system. *Nature* 424:303.

## 803 Tables and Figures

Table 1: Bayesian estimates of variance effective population sizes for different sublines and time periods.

| Time period | Median | 95% ETPIs   |
|-------------|--------|-------------|
| P-F4        | 8.82   | 8.60–9.04   |
| F4-F16A     | 68.84  | 66.69–71.05 |
| F4-F16B     | 56.77  | 55.24–58.35 |
| P-F16A      | 28.69  | 28.00–29.34 |
| P-F16B      | 27.25  | 26.68–27.91 |

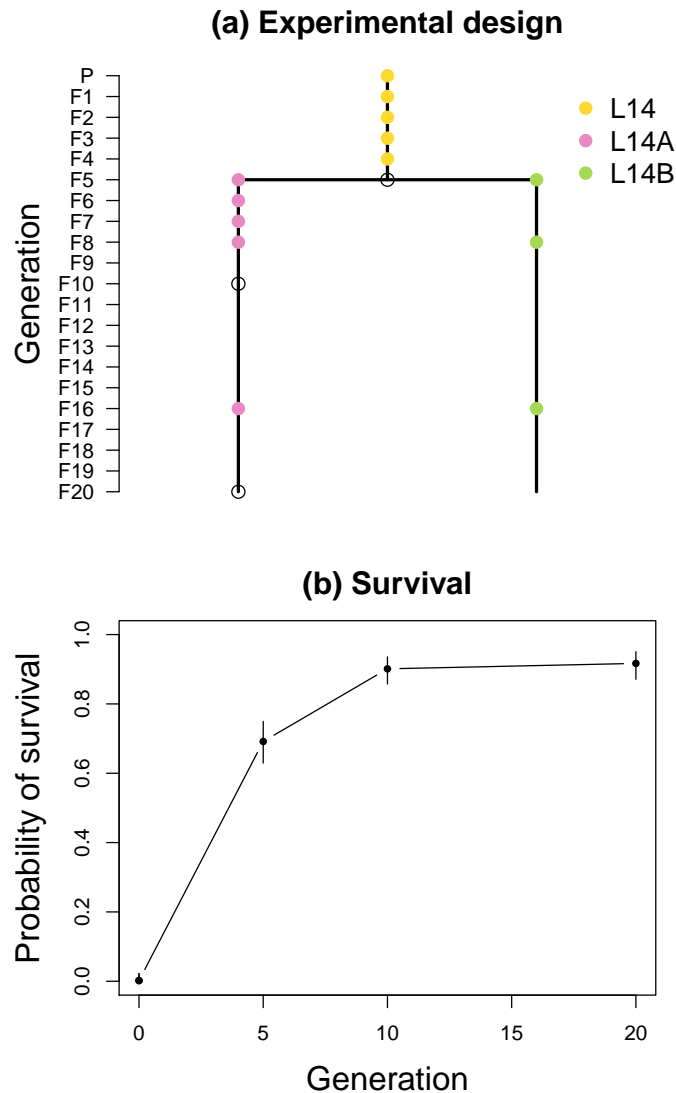

Figure 1: Design for the evolve and resequence experiment. The L14 lentil line was established from an Indian mung bean line (a). At the F5 generation, L14 was split into sublines A and B. Samples were taken for genetic analysis every generation up to F4 (black dots), and then in subline A in the F5–F8, and F16 generations (orange dots), and subline B in the F5, F8, and F16 generations (blue dots). Open circles denote generations in which fitness was assayed. Bayesian estimates of survival on lentil (b). Survival was measured at generations L14–F5, L14A–F10, L14A–F20, and in the Indian mung bean line, which is shown as generation 0. Points and vertical lines denote posterior medians and 95% equal-tail probability intervals.

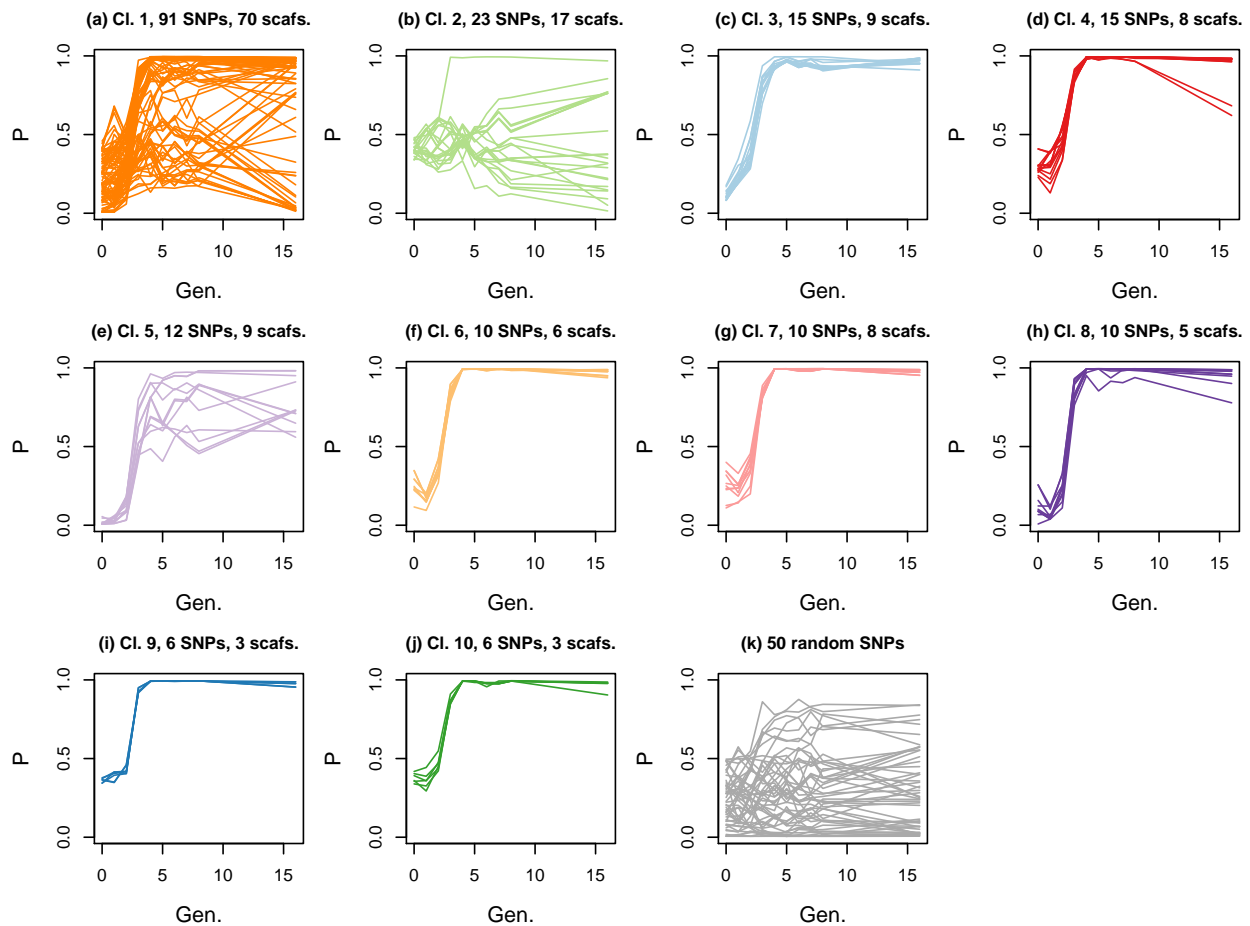

Figure 2: Plots depict patterns of allele frequency change for L14 subline A (L14A). Panels (a)–(j) show allele frequency ( $P$ ) over time (Gen. = generation) for the 198 focal SNPs. Each line shows the allele frequency trajectory for a single SNP and these are organized into panels by the LD clusters delineated in the F1 generation (Cl. = cluster number; see Fig. 3 and the main text for details). Colors correspond with those from L14–F1 in Fig. 3(a). The number of SNPs and number in each panel and number of scaffolds on which they reside is given. Panel (k) shows patterns of change for 50 randomly selected SNPs. In all cases, the frequency of the minor allele from the parental generation is shown. See Fig. S7 for similar results from L14B.

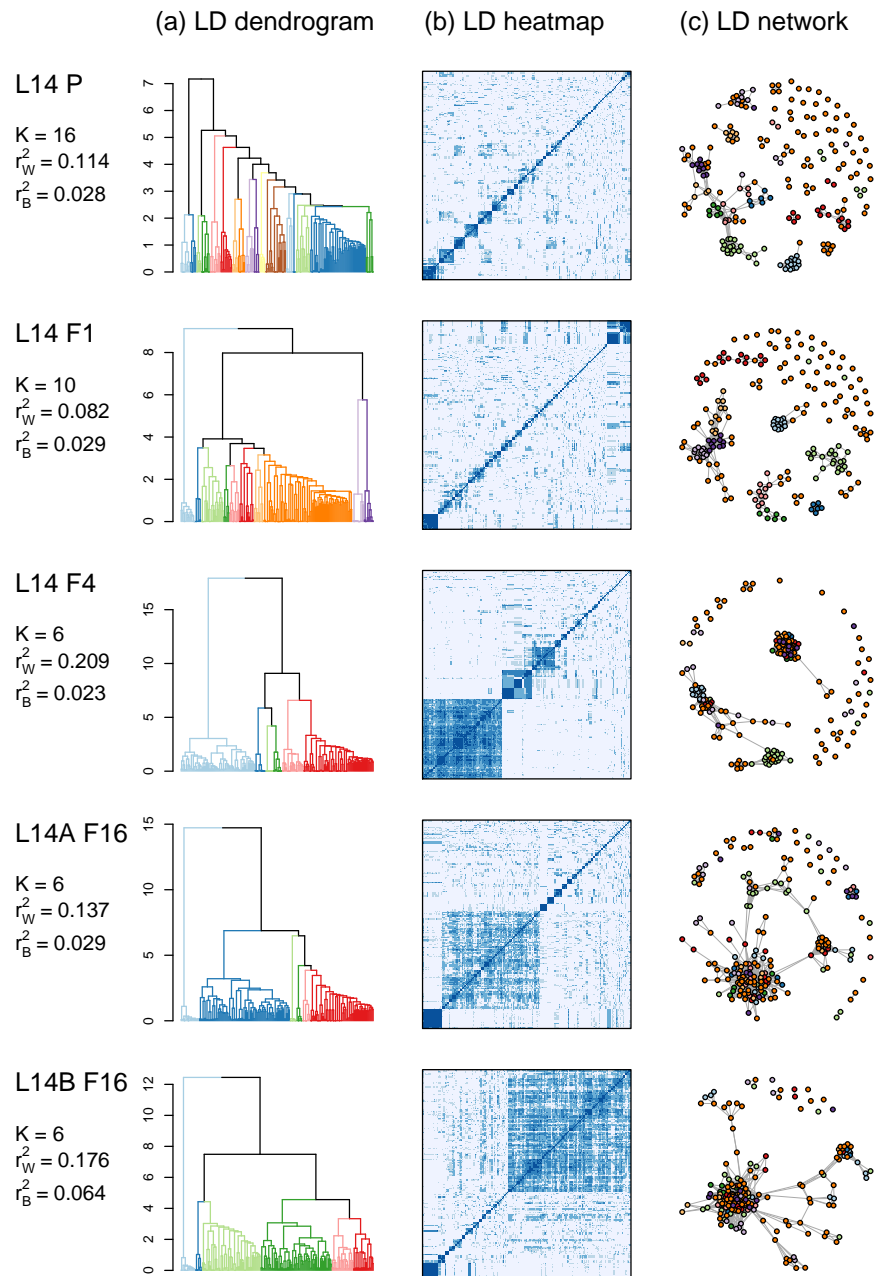

Figure 3: Patterns of LD among the 198 focal SNPs for L14–P, L14–F1, L14–F4, L14A–F16 and L14B–F16. Panel (a) shows dendrograms from hierarchical clustering of SNPs based on LD, with colors denoting clusters delineated with the `cutreeDynamic` function (colors do not track clusters across generations). The number of clusters ( $K$ ) and mean LD for SNPs in the same ( $r_W^2$ ) versus different ( $r_B^2$ ) clusters are given. The corresponding pairwise LD matrixes are shown as heat maps in panel (b) (darker shades of blue denote high LD). Panel (c) shows networks connecting SNPs (nodes = colored dots) with high LD ( $r^2 \geq 0.25$ ). Nodes are colored based on their cluster membership as defined by hierarchical clustering in the F1 generation (see panel a) (compare to Fig. S9).

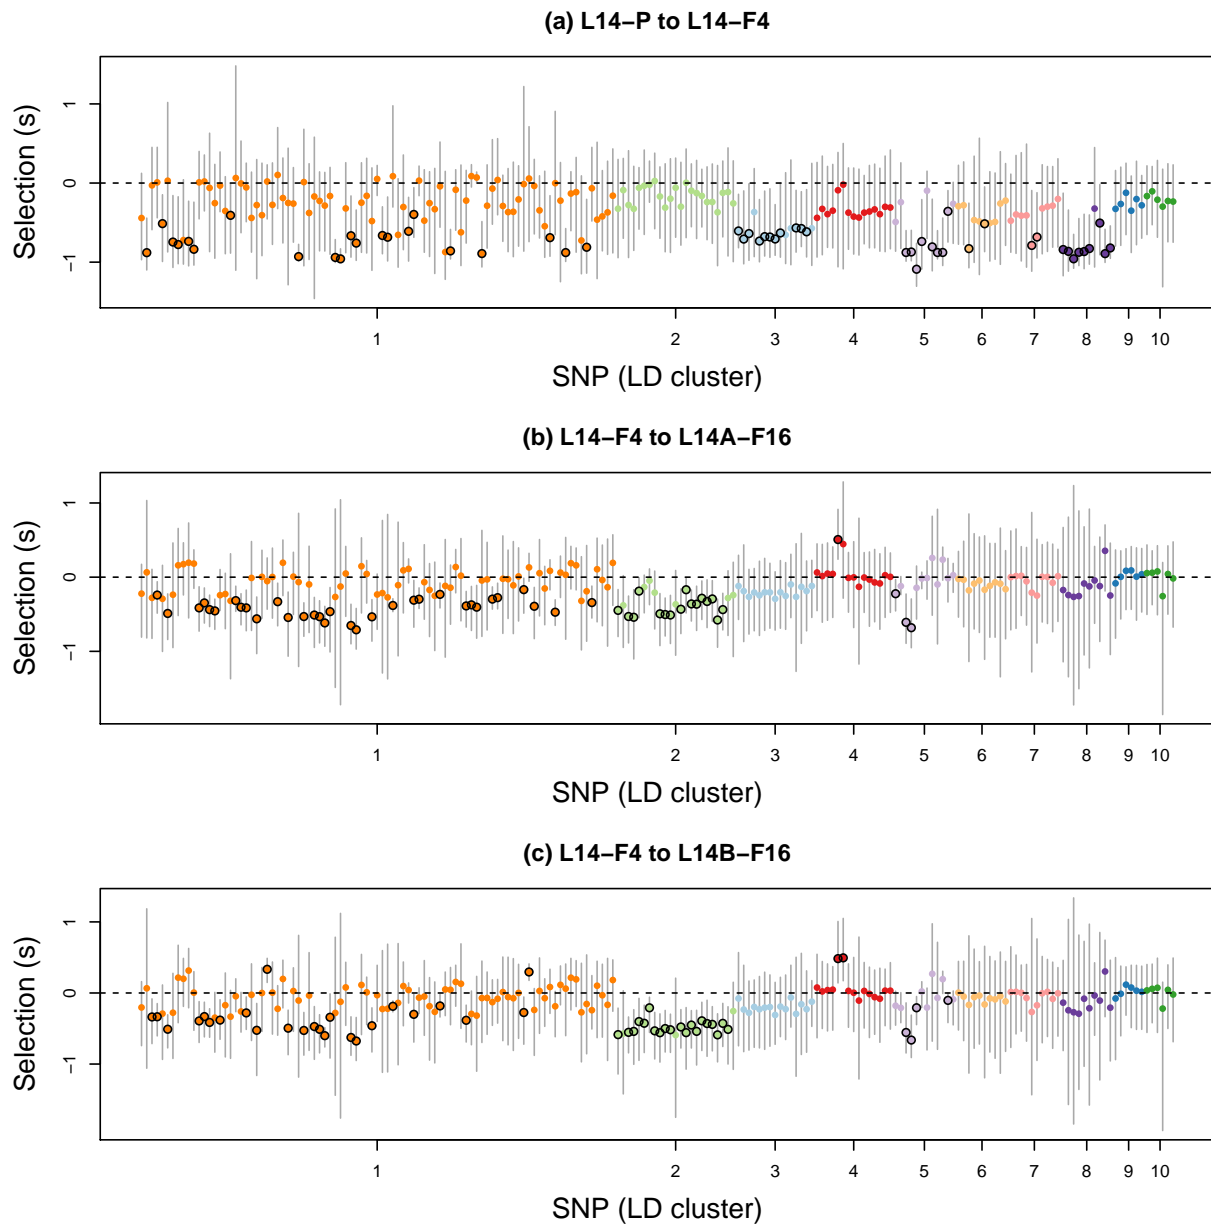

Figure 4: Scatter plots show Bayesian estimates of selection coefficients for the 198 focal SNPs in different generations and sublines. Dots and vertical bars denote posterior medians and 95% equal-tail probability intervals (ETPIs), respectively. Colors and the order of SNPs reflect LD cluster membership in the F1 generation. Black circles around dots denote cases where the 95% ETPIs exclude 0. For the purpose of visualization, we have polarized estimates of  $s$  such that negative values indicate selection favoring the minor allele.

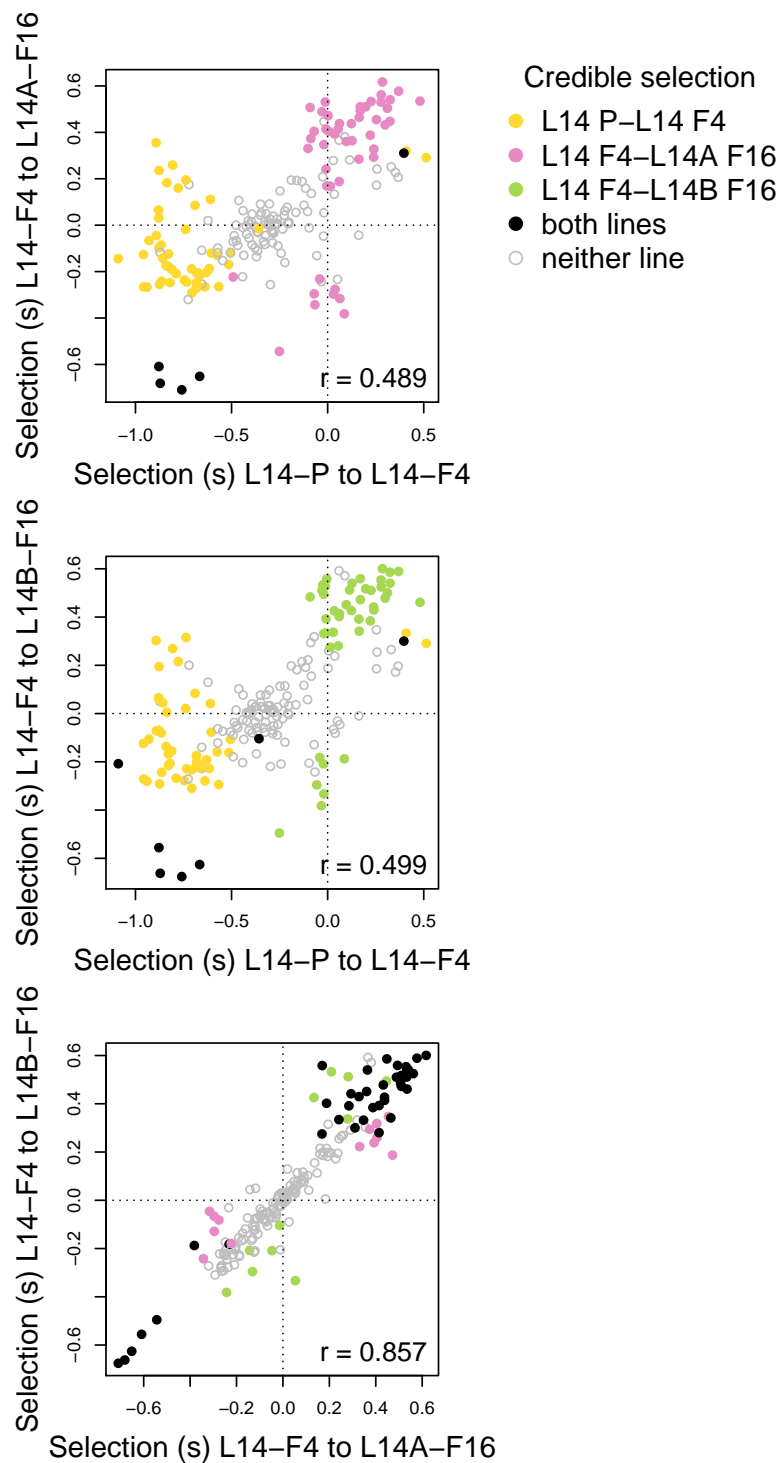

Figure 5: Scatter plots show the relationships between selection coefficient estimates for the 198 focal SNPs in different time intervals and sublines. Dots correspond to SNPs and are colored based on whether there was credible evidence of selection in each subline/interval. Pearson correlations account for uncertainty in estimates of selection (i.e., they are not based solely on the point estimates shown here).



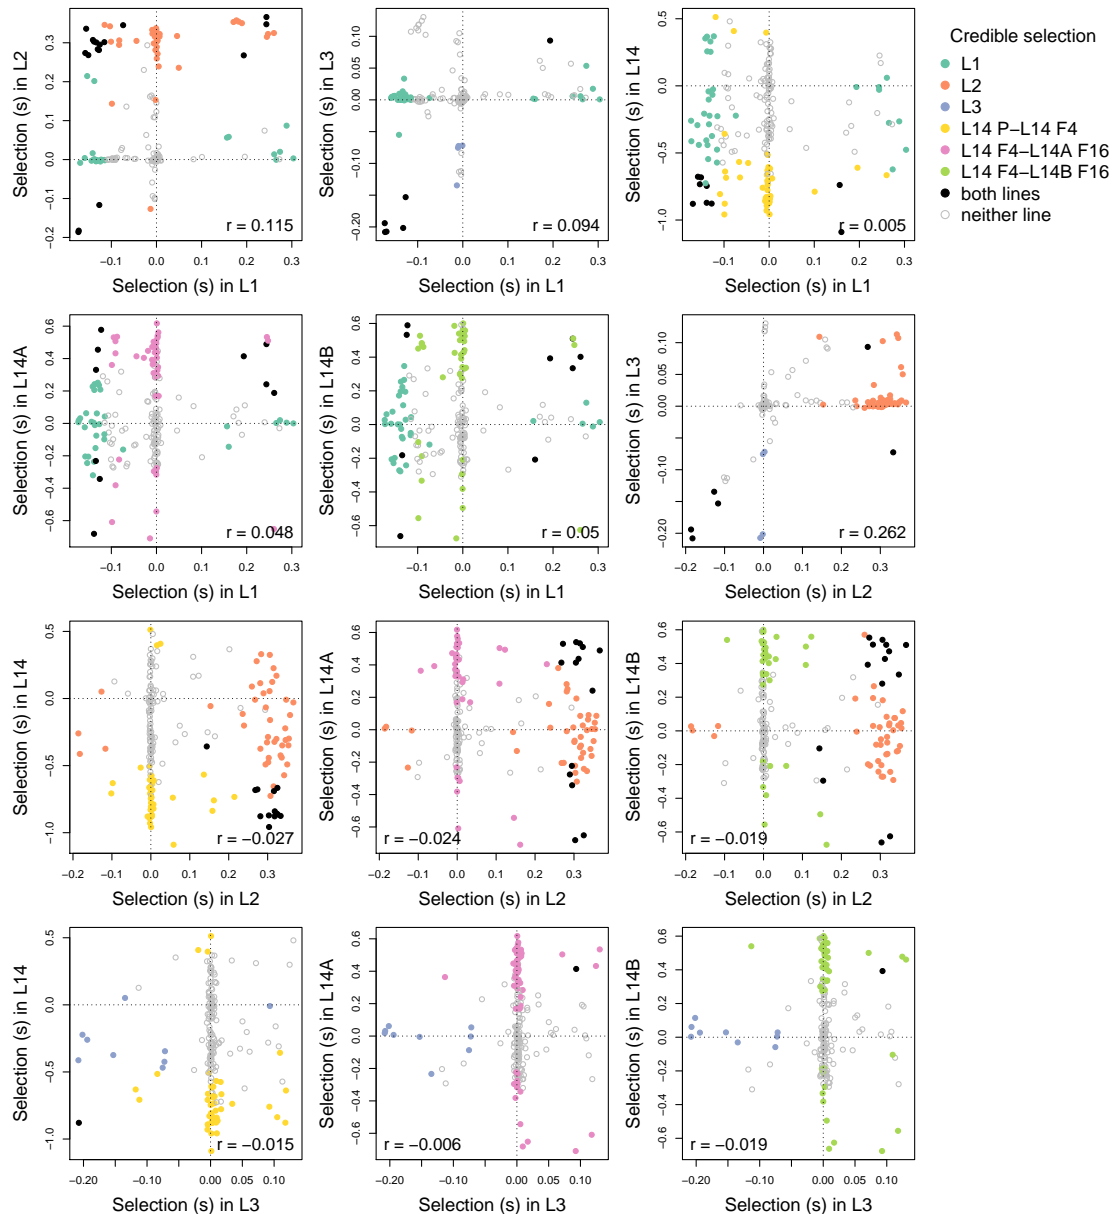

Figure 6: Scatter plots show the relationships between selection coefficient estimates for the focal SNPs between lines and sub-lines. For comparisons with lines L1, L2, and L3, the 188 SNPs present in those lines are shown. Dots correspond to SNPs and are colored based on whether there was credible evidence of selection in each (sub)line. Pearson correlations account for uncertainty in estimates of selection (i.e., they are not based solely on the point estimates shown here).
