# Dynamics of genomic change during evolutionary rescue in the seed beetle *Callosobruchus maculatus*

Alexandre Rêgo<sup>1,2</sup>, Frank J. Messina<sup>1,2</sup>, Zachariah Gompert<sup>1,2\*</sup>

<sup>1</sup> Department of Biology, Utah State University, Logan, UT 84322, USA

<sup>2</sup> Ecology Center, Utah State University, Logan, UT 84322, USA

*Corresponding author:* Zachariah Gompert  
Department of Biology  
5305 Old Main Hill  
Utah State University  
Logan, UT 84322-5305  
Phone: (435) 797-9463  
Email: zach.gompert@usu.edu

**Running title:** Dynamics of evolutionary rescue

## 1 Abstract

2 Rapid adaptation can prevent extinction when populations are exposed to extremely marginal  
3 or stressful environments. Factors that affect the likelihood of evolutionary rescue from ex-  
4 tinction have been identified, but much less is known about the evolutionary dynamics (e.g.,  
5 rates and patterns of allele frequency change) and genomic basis of successful rescue, par-  
6 ticularly in multicellular organisms. We conducted an evolve-and-resequence experiment to  
7 investigate the dynamics of evolutionary rescue at the genetic level in the cowpea seed bee-  
8 tle, *Callosobruchus maculatus*, when it is experimentally shifted to a stressful host plant,  
9 lentil. Low survival ( $\sim 1\%$ ) at the onset of the experiment caused population decline. But  
10 adaptive evolution quickly rescued the population, with survival rates climbing to 69% by  
11 the F5 generation and 90% by the F10 generation. Population genomic data showed that  
12 rescue likely was caused by rapid evolutionary change at multiple loci, with many alleles  
13 fixing or nearly fixing within five generations of selection on lentil. Selection on these loci  
14 was only moderately consistent in time, but parallel evolutionary changes were evident in  
15 sublines formed after the lentil line had passed through a bottleneck. By comparing esti-  
16 mates of selection and genomic change on lentil across five independent *C. maculatus* lines  
17 (the new lentil-adapted line, three long-established lines, and one case of failed evolutionary  
18 rescue), we found that adaptation on lentil occurred via somewhat idiosyncratic evolutionary  
19 changes. Overall, our results suggest that evolutionary rescue in this system can be caused  
20 by very strong selection on multiple loci driving rapid and pronounced genomic change.

21 **Keywords:** evolutionary rescue; experimental evolution; evolve and resequence;  
22 approximate Bayesian computation; *Callosobruchus maculatus*; parallel evolu-  
23 tion

## 24 Introduction

25 Decades of field and lab studies have shown that adaptation can be rapid, in some cases  
26 occurring over a few to several generations (e.g., Steinhauer & Holland, 1987; Grant &  
27 Grant, 2002; Thompson, 2013; Bergland *et al.*, 2014; Elmer *et al.*, 2014; Nosil *et al.*, 2018).  
28 Evidence for rapid adaptive evolution is particularly common in human-altered environments  
29 (e.g., during adaptation to pesticides, antibiotics, or pollution; Palumbi, 2001; Vonlanthen  
30 *et al.*, 2012; Cook & Saccheri, 2013) or when adaptation is driven by interactions among  
31 species (e.g., resource competition, host-pathogen interactions, or predator-prey interactions;  
32 Yoshida *et al.*, 2003; Stuart *et al.*, 2014; Antonio-Nkondjio *et al.*, 2015; Behrman *et al.*, 2018).  
33 Rapid adaptive evolution may also prevent sustained demographic decline and extinction  
34 when populations are exposed to extremely marginal or stressful environments during a  
35 process known as evolutionary rescue (Gomulkiewicz & Holt, 1995; Bell & Gonzalez, 2009;  
36 Gonzalez *et al.*, 2013; Lindsey *et al.*, 2013; Orr & Unckless, 2014). Whereas most theory and  
37 experiments have focused on the probability of evolutionary rescue under different conditions  
38 (reviewed in Bell, 2017), much less is known about the evolutionary dynamics (e.g., rates  
39 and patterns of evolutionary change over time at individual loci or across the genome) and  
40 genomic consequences of rescue when it occurs (but see Wilson *et al.*, 2017).

41 Evolutionary rescue differs from other forms of adaptive evolution in a few key ways  
42 that could result in distinct evolutionary dynamics and genomic signals. First, evolution-  
43 ary rescue couples ecological and evolutionary dynamics, because low absolute fitness in a  
44 deteriorating or stressful environment causes population decline that is then reversed when  
45 evolution leads to a sufficiently large increase in absolute fitness (Gomulkiewicz & Holt,  
46 1995; Orr & Unckless, 2014). Second, compared to other cases of adaptive evolution, evo-  
47 lutionary rescue necessarily occurs in populations far from a phenotypic optimum (because  
48 population decline implies a poor fit to the current environment). Thus, mutations of major  
49 effect could contribute disproportionately to evolutionary rescue (McKenzie & Batterham,

50 1994; Orr, 2005). Consistent with this prediction, theory (e.g., Fisher’s geometric model;  
51 Fisher, 1938; Orr, 1998) and experimental evolution studies (e.g., Lenski *et al.*, 1991; Barrick  
52 *et al.*, 2009) suggest that mutations of major effect drive early stages of adaptation. Recent  
53 theory also suggests that evolutionary rescue is more likely when standing genetic variation  
54 is present, and may often involve soft selective sweeps in which multiple beneficial mutations  
55 increase in frequency simultaneously (Hermisson & Pennings, 2005; Bell, 2017; Wilson *et al.*,  
56 2017). Thus, substantial genetic variation might be retained in a population throughout this  
57 process.

58 Because evolutionary rescue often involves rapid adaptation (e.g., Bell & Gonzalez,  
59 2009; Bell, 2013; Vander Wal *et al.*, 2013; Kreiner *et al.*, 2017), cases of rescue could pro-  
60 vide tractable opportunities to study the dynamics of adaptive alleles during a complete  
61 bout of adaptation, that is, from the onset of population decline to when a population has  
62 rebounded demographically. Such studies should also help determine whether instances of  
63 repeated ecological dynamics (e.g., population decline and recovery) are driven by repeat-  
64 able evolutionary dynamics, and thus whether eco-evolutionary dynamics are repeatable or  
65 predictable (Rudman *et al.*, 2018). Whereas experimental studies have documented patterns  
66 of ecological and evolutionary change during rescue (e.g., Bell & Gonzalez, 2009; Gonzalez  
67 & Bell, 2013; Ramsayer *et al.*, 2013; Killeen *et al.*, 2017), such work has mostly focused on  
68 microorganisms (but see, e.g., Agashe, 2009; Agashe *et al.*, 2011) and has rarely been com-  
69 bined with genetic or genomic data. Here, we conduct an evolve-and-resequence experiment  
70 to investigate the dynamics and outcome of evolutionary rescue at the genetic level in the  
71 cowpea seed beetle, *Callosobruchus maculatus* (Chrysomelidae), when it is experimentally  
72 shifted to a marginal host plant, lentil (*Lens culinaris*, Fabaceae).

73 *Callosobruchus* beetles infest human stores of grain legumes. Females attach eggs  
74 to the surface of legume seeds. Upon hatching, larvae burrow into and develop within a  
75 single seed. Because *C. maculatus* has been associated with stored legumes for thousands of  
76 years, laboratory conditions are a good approximation of its “natural” environment (Tuda

77 *et al.*, 2014). Beetle populations mainly attack grain legumes in the tribe Phaseoleae, par-  
78 ticularly those in the genus *Vigna* (Tuda *et al.*, 2006). Lentil (*L. culinaris*), a member of  
79 the tribe Fabeae, is a poor host for most *C. maculatus* populations, as larval survival in  
80 seeds is typically <5% (Messina *et al.*, 2009a,b, 2018). However, lentil is used as a host by  
81 a few unusual ecotypes (Credland, 1987, 1990). Previous attempts to establish laboratory  
82 populations on lentil have often resulted in extinction (Credland, 1987), but in a few cases  
83 experimental lines have rapidly adapted to lentil (Messina *et al.*, 2009b). For example, in  
84 three experimental lines, survival rose from ~2% to >80% within 20 generations, and these  
85 lines have now persisted on lentil for >100 generations (Gompert & Messina, 2016). Thus,  
86 evolutionary rescue can occur in this system.

87 In the current study, we established a new lentil-adapted line (denoted L14), which we  
88 then split into two sublines (L14A and L14B) before evolutionary rescue was complete, that  
89 is, after the population began to rebound from an initial bottleneck, but before it reached a  
90 performance plateau (Fig. 1). We sampled and sequenced beetles nearly every generation,  
91 and could thus characterize genome-wide evolutionary dynamics on a fine temporal scale.  
92 Our goal was not to identify specific genes that mediate evolutionary rescue, but rather to  
93 determine (i) whether rescue depends on a few or many genetic loci, (ii) whether selection  
94 on individual genetic loci is consistent throughout the process (across time and between  
95 sublines), and (iii) whether selection causes alleles to fix or instead causes more subtle shifts  
96 in allele frequencies (i.e., partial or incomplete sweeps), as has been observed during other  
97 evolve-and-resequence experiments with multicellular organisms (e.g., Burke *et al.*, 2010;  
98 Graves Jr *et al.*, 2017). We focus on a single lentil line, because other recent attempts to  
99 establish lentil lines failed (>10 lines started between October 2013 and September 2014),  
100 resulting in extinction. This precludes us from directly asking about the repeatability of  
101 genomic change during evolutionary rescue and of using parallel change as evidence of selec-  
102 tion (we instead rely on models that account for the effects of drift when inferring selection).  
103 However, we are able to compare patterns of genomic change during rescue for this single

104 new lentil line with the genomic outcomes of rescue in three independently derived, long-  
105 established lentil lines (lines L1, L2 and L3), and with a case of failed evolutionary rescue  
106 from one of our other recent attempts to establish *C. maculatus* on lentil (hereafter, line  
107 L11) (Fig. 1a). We treat these as exploratory comparisons designed to provide preliminary  
108 insights into the ways in which patterns of genome-wide evolutionary change in *C. maculatus*  
109 on lentil might be repeatable.

## 110 **Materials & Methods**

### 111 **Study system, selection experiment and fitness assays**

112 The new line (L14) produced for the current study, the three long-established lentil lines  
113 (L1-L3) (~100 generations on lentil), and the line that failed to adapt to lentil (L11) were  
114 derived from the same base population of *C. maculatus* that was originally collected from  
115 southern India (Messina, 1991; Mitchell, 1991) (Fig. 1a). This base population had been  
116 continuously reared on mung bean, *Vigna radiata* (L.) Wilczek, for >300 generations at  
117 the time we began this experiment. Previous assays demonstrated that, for this Indian  
118 beetle population, initial survival to adult emergence is only 1-2% in lentil (Messina *et al.*,  
119 2009b; Messina & Jones, 2011). Consequently, there is always a severe initial bottleneck,  
120 and most attempts to produce a self-sustaining population on lentil seeds eventually fail  
121 (Messina *et al.*, 2009a; Gompert & Messina, 2016). In the lines designated L1-L3, survival  
122 increased rapidly over the course of only a few generations. Survival reached >60% after  
123 only five generations, and >80% in fewer than 20 generations (Messina *et al.*, 2009b). At  
124 the same time, there were substantial reductions in development time and increases in body  
125 size. Genomic analyses of these lines, which focused on genetic trade-offs for adaptation  
126 to mung bean versus lentil, did not commence until each had been maintained on lentil for  
127 80-100 generations, and had reached a plateau with respect to performance on the novel host

128 (Gompert & Messina, 2016). Hence, we did not capture the initial stages of adaptation in  
129 the earlier study. This can be important, as early stages of rescue can have an sizeable effect  
130 on outcomes (e.g., Lagator *et al.*, 2014).

131         The three lentil-adapted lines (L1-L3) were established as described by Messina *et al.*  
132 (2009a,b). We followed the same protocol in the current study. Our goal was to establish  
133 one or more lentil-adapted lines, as this would allow us to sample the line(s) every generation  
134 for population genomic analyses during the early phase of adaptation (as described below).  
135 As expected, multiple (>10) initial attempts to produce a new lentil-adapted line eventually  
136 resulted in population extinction (including L11), but a single line (L14) exhibited the rapid  
137 rise in survival previously observed in L1-L3 (see Results). This line was formed by adding  
138 >4000 founding adults to 1500 g of lentil seeds (about 24,000 seeds). Most F1 offspring  
139 emerged 55–65 days after the founding adults were added. We transferred F1 beetles (ap-  
140 proximately 100–200 individuals) to a new jar to form the F2 generation. Following the  
141 severe bottleneck in the initial generation on lentil, larval survival in seeds increased rapidly  
142 (as described below), so that we were able to use at least a few hundred beetles to form each  
143 successive generation (as in past work, transfers were made during the peak of emergence to  
144 avoid artificial selection for rapid or delayed development; Messina *et al.*, 2009b). After five  
145 generations, the L14 population size was sufficiently high to implement standard culturing  
146 techniques, which involved transferring >2000 beetles to a new batch of 750g lentil seeds  
147 each generation (see “Culturing and establishing lines” in the OSM). At the F5 generation,  
148 the L14 line was split into sublines A and B (Fig. 1b) (this was the first generation where  
149 a sufficient number of beetles emerged to subdivide the line). By doing so, we could assess  
150 whether the evolutionary dynamics after a shared bottleneck were repeatable (i.e., parallel).  
151 While our experiment achieved some replication by using two sublines and by conducting  
152 comparisons with the older lentil lines and one of the failed new lines, we lack replication for  
153 evolutionary dynamics during the early stages of (successful) adaptation (i.e., of evolution-  
154 ary rescue). Nonetheless, even one or a few instances of adaptation can provide important

155 insights into how evolution can occur (examples of this include the evolution of beak size in  
156 response to drought in Darwin’s finches and the evolution of citrate metabolism in *E. coli*,  
157 with the latter occurring in only one of a dozen replicate lines; Grant & Grant, 2002; Blount  
158 *et al.*, 2008).

159 By the F5 generation, the population size of the L14 line was sufficiently high to apply  
160 our standard protocol for measuring survival in lentil from egg hatch to adult emergence  
161 (Messina *et al.*, 2009b). We established a cohort of larvae in lentil seeds by first placing  
162 three pairs of newly emerged adults into each of 40 petri dishes containing about 100 lentil  
163 seeds. After 10-15 days, we collected a few seeds bearing a single hatched egg from each dish,  
164 and isolated each seed in a 4-ml vial. Vials were inspected daily for adult emergence until  
165 two weeks after the last adult had emerged. We collected a total of 224, 224, and 182 infested  
166 seeds for assays of the F5, F10, and F20 generations (Fig. 1b). To reduce any effects of  
167 parental host, the L14 line was reverted back to mung bean for one generation (i.e., parents  
168 of all test larvae had developed in mung bean) (Messina *et al.*, 2009a). Survival probabilities  
169 were estimated using a Bayesian binomial model with an uninformative (Jefferys) beta prior  
170 on the survival proportions. This model has an analytical solution,  $Pr(p|y, n) = \text{beta}(\alpha =$   
171  $y + 0.5, \beta = n - y + 0.5)$ , where  $p$  is the survival probability and  $y$  is the number of beetles  
172 that survived out of the  $n$  infested seeds. Thus, exact posteriors are presented.

## 173 Genetic data

174 We sampled and isolated genomic DNA from 48 adult beetles per generation for the L14  
175 founders (the P generation) as well as for the F1-F4 generations. After L14 line was split into  
176 two sublimes (A and B) we sampled beetles from subline A (L14A) at generations F5, F6, F7,  
177 F8 and F16, and from subline B (L14B) at generations F5, F8 and F16 (Fig. 1b). We also  
178 sampled and isolated DNA from the failed F11 line; this was done in the F4 generation only  
179 (48 individuals were sampled; see “The L11 line” in the OSM for additional details). We  
180 generated partial genome sequences for these 672 *C. maculatus* beetles using our standard



181 genotyping-by-sequencing approach (see “Our GBS approach” in the OSM; Gompert *et al.*,  
182 2012, 2014b). This approach provides a sample of SNPs distributed across the genome. We  
183 do not assume that the actual alleles responsible for lentil adaptation are included in this  
184 set of SNPs, but we do expect these data to include SNPs indirectly affected by selection on  
185 the causal genetic loci through linkage disequilibrium (LD). This genomic sampling scheme  
186 should thus provide a reasonable approximation of the evolutionary dynamics of causal  
187 variants. Our approach differs in some respects from most evolve-and-resequence experiments  
188 that used pooled whole genome sequencing of samples taken at a few time points (e.g., Burke  
189 *et al.*, 2010; Orozco-terWengel *et al.*, 2012; Tobler *et al.*, 2014; Graves Jr *et al.*, 2017). By  
190 foregoing the expenses associated with whole-genome sequencing (the standard approach), we  
191 were able to obtain (partial) genome sequence data that were tied to individual seed beetles,  
192 and we were able to sample nearly every generation during adaptation. These individual-level  
193 data were critical for confidently measuring LD among loci. Moreover, because adaptation  
194 was so rapid, we likely would have missed most of the dynamics of adaptation without our  
195 fine-scale temporal sampling (see Results and Discussion). The might not be a problem in  
196 systems where adaptation occurs more slowly, but it is hard to know the pace of adaptation  
197 without such temporal resolution.

198 We used the `aln` and `samse` algorithms from `bwa` (ver. 0.7.10) (Li & Durbin, 2009)  
199 to align the 764 million  $\sim$ 86 bp DNA sequences (after trimming barcodes) to a new draft  
200 genome assembly for *C. maculatus* (Fig. S1; see “*De novo* assembly of a *C. maculatus*  
201 genome” and “Alignment and variant calling” in the OSM for details). We then identified  
202 SNPs using the Bayesian multiallelic/rare variant caller from `samtools` (version 1.5) and  
203 `bcftools` (version 1.6) (implemented with the `-m` option in `bcftools call`). SNPs were  
204 subsequently filtered based on a variety of criteria, including minimum mean coverage ( $\approx 2 \times$   
205 per beetle), maximum percent missing data (30%), and mapping quality (30) (see the OSM  
206 for details). We retained 21,342 high-quality SNPs after filtering (about 1 SNP per 50  
207 kpbs). Genetic data from the long-established lentil lines (L1, L2, and L3) were described

208 in Gompert & Messina (2016). These samples were collected after 100 (L1), 87 (L2) and  
209 85 (L3) generations of evolution on lentil ( $N = 40$  individuals per line), and also include a  
210 reference sample from the source mung bean line collected at the same time the lentil lines  
211 were sampled (M14,  $N = 48$ ). We aligned these data to our new genome assembly and called  
212 SNPs as described above, but only considered the 21,342 SNPs already identified from the  
213 L14 data set. 18,637 of these SNPs were found to also be variable in the L1–L3 data set.

214 We used a hierarchical Bayesian model to estimate the allele frequencies for the 21,342  
215 SNPs in L14 (and L11) at each sampled generation, and for the 18,637 SNPs in the L1, L2  
216 and L3 data set (Gompert & Messina, 2016). This model jointly infers genotypes and allele  
217 frequencies while accounting for uncertainty in each due to finite sequence coverage and  
218 sequence errors, and thereby allows precise and accurate estimates of allele frequencies with  
219 low to moderate sequence coverage for individual beetles (see “Allele frequency model” in  
220 the OSM for details; Buerkle & Gompert, 2013). Allele frequency estimates were based on  
221 two Markov-chain Monte Carlo runs per sample (i.e., line by generation combination), with  
222 each consisting of a 5000 iteration burn-in and 15,000 sampling iterations with a thinning  
223 interval of 5. We then calculated the mean expected heterozygosity (across SNPs) and  
224 pairwise genotypic linkage disequilibrium (measured with  $r^2$  and based on the mean of the  
225 posterior for each genotype) among all pairs of SNPs each generation as summary metrics of  
226 genetic variation (calculations were made in R without any specialized packages; see DRYAD  
227 doi:10.5061/dryad.0tr36fp for the specific code we used).

## 228 **Parameterizing and testing a null model of genetic drift**

229 We estimated the variance effective population size ( $N_e$ ) during the L14 experiment from  
230 patterns of allele frequency change, and then used the estimates of  $N_e$  to parameterize and  
231 test a null model of evolution solely by genetic drift. We did this not as a formal test for  
232 selection, but rather to identify the set of SNPs that were most likely to have been affected,  
233 at least indirectly (i.e., through linkage disequilibrium), by selection. We estimated variance

234 effective populations sizes as described in Gompert (2016) using a Bayesian bootstrap method  
235 (see "Bayesian bootstrap" in the OSM for details; Jorde & Ryman, 2007; Foll *et al.*, 2015).  
236 Distinct estimates of  $N_e$  were obtained for the following generation intervals and (sub)lines:  
237 from L14 P to L14 F4, from L14 F4 to L14A F16, and from L14 F4 to L14B F16. We placed  
238 a uniform prior on  $N_e$  (lower bound = 5, upper bound = 2000), and generated samples from  
239 the posterior distribution using 1000 bootstrap replicates. The variance effective population  
240 size for the failed L11 line was estimated in a similar manner (see "The L11 line" in the  
241 OSM).

242 We then asked whether the magnitude of allele frequency change for each SNP devi-  
243 ated from null expectations under a model of pure drift, given the estimated values of  $N_e$  (we  
244 used the posterior median for this, see "Bayesian bootstrap" in the OSM). As with our esti-  
245 mates of  $N_e$ , we separately tested for deviations from neutrality for the following generation  
246 intervals and (sub)lines: from L14 P to L14 F4, from L14 F4 to L14A F16, and from L14 F4  
247 to L14B F16. We calculated the probability of the observed allele frequency change from the  
248 start to end of each of these intervals based on a beta approximation to the basic Wright-  
249 Fisher model (Ewens, 2012). Specifically, we assumed  $p_t|p_0 \sim \text{beta}(\alpha + 0.001, \beta + 0.001)$ ,  
250 where  $\alpha = p_0 \frac{1-F}{F}$ ,  $\beta = (1 - p_0) \frac{1-F}{F}$ ,  $p_0$  and  $p_t$  are the allele frequencies at the beginning and  
251 end of the interval,  $F = 1 - (1 - \frac{1}{2N_e})^t$ ,  $t$  is the number of generations between samples, and  
252  $N_e$  is the variance effective population size. We retained SNPs with allele frequency changes  
253 more extreme than the 0.1th or 99.9th percentiles of the null distribution for any of the three  
254 time intervals for further analyses (Figs. S2, S3). We identified 198 SNPs (188 of which were  
255 variable in L1, L2 and L3) based on these relatively conservative criteria, and we hereafter  
256 focus primarily on the evolutionary dynamics at and effect of selection on these "focal" SNPs  
257 (this is a greater number of SNPs than expected by chance under the null hypothesis of no  
258 selection on any SNPs; binomial probability, expected = 128.1 SNPs,  $P = 2.77e^{-8}$ ).

## 259 **Quantifying patterns of linkage disequilibrium over time**

260 To assess the potential for evolutionary independence among these focal loci, we calculated  
261 the squared correlation ( $r^2$ ) between genotypes for all pairs of the 198 SNPs as a metric  
262 of linkage disequilibrium (LD). We used Bayesian point estimates of genotypes (posterior  
263 means) for this analysis. Estimates of LD were made for each generation and (sub)line and  
264 were compared across generations. Hierarchical clustering and network-based methods were  
265 then used to identify and visualize groups or clusters of SNPs in high LD, with a focus on  
266 patterns of LD in L14–P, L14–F1, L14–F4, L14A–F16 and L14B–F16. We used the Ward  
267 agglomeration method implemented in the R `hclust` function for hierarchical clustering  
268 (from `fastcluster` version 1.1.24; Müllner *et al.*, 2013). Clusters of high LD SNPs were  
269 then delineated using the `cutreeDynamic` R function (version 1.63-1) with the cut height set  
270 to 99% of the truncated height range of the dendrogram (Langfelder *et al.*, 2016). Next, we  
271 visualized patterns of LD using networks with each of the 198 SNPs denoted by a node and  
272 edges connecting SNPs in high LD. To do this, we created an adjacency matrix from each  
273 LD matrix. SNPs were considered adjacent, that is connected in the network, when the  $r^2$   
274 metric of LD was 0.25 or greater; this cut-off corresponds with the 97.5th percentile of the  
275 empirical LD distribution for the focal SNPs in L14 P. The R package `igraph` (version 1.2.1)  
276 was used to construct and visualize these networks (Csardi & Nepusz, 2006).

## 277 **Estimating selection in the L14 lines**

278 We estimated the selection experienced by each of the 198 SNPs in L14 from generation P  
279 to F4, and then in each subline from generation F4 to F16. These estimates, including their  
280 consistency between earlier (up to F4) and later (from F4 to F16) stages of evolutionary res-  
281 cue (i.e., adaptation to lentil) were used as our primary process-based metric of evolutionary  
282 dynamics (patterns of LD and allele frequency changes themselves provided pattern-based  
283 metrics of evolutionary dynamics). Comparisons of selection coefficients between L14 sub-

284 lines and time periods allowed us to assess the consistency (over generations and between  
285 sublines) of population genomic patterns associated with evolutionary rescue on lentil in *C.*  
286 *maculatus*.

287 We used approximate Bayesian computation (ABC) to fit Wright-Fisher models with  
288 selection and thereby estimate selection coefficients for each SNP in each (sub)line and time  
289 period (Ewens, 2012; Gompert & Messina, 2016). This approach uses a stochastic, process-  
290 based model of evolution to estimate selection from temporal patterns of allele frequency  
291 change while accounting for genetic drift. Thus, in contrast to alternative analytical ap-  
292 proaches that do not model drift (e.g., Burke *et al.*, 2010), the approach we used does not  
293 rely on parallel patterns of change in replicate lines to distinguish between selection and  
294 drift. See Fig. 2 for a graphical overview of the model and inference procedure.

295 We assumed that marginal relative fitness values for the three genotypes at each  
296 locus were given by  $w_{11} = 1 + s$ ,  $w_{12} = 1 + hs$ , and  $w_{22} = 1$ , where  $s$  is the selection  
297 coefficient,  $h$  is the heterozygote effect, and 1 and 2 denote the reference and non-reference  
298 allele, respectively. Critically,  $s$  reflects the combined effects of indirect and (possibly) direct  
299 selection on each SNP, and is thus the marginal selection on each SNP. That is, it includes  
300 the effect of selection transmitted to a SNP because of LD with one or more causal variants  
301 (Gompert *et al.*, 2014a; Egan *et al.*, 2015; Gompert *et al.*, 2017). Our primary interest was in  
302 estimating  $s$ , but we included  $h$  as a free parameter to account for the effect of uncertainty  
303 in  $h$  on inference of  $s$ , and to extract any information available from the data on  $h$ . We  
304 considered three evolutionary models with different assumptions about variation in  $s$  and  
305  $h$ , (i) a fully constrained model with constant  $s$  (and  $h$ ) over time and across sublines, (ii)  
306 a partially constrained model that allowed  $s$  and  $h$  to change at the F4 generation but  
307 with identical selection in both sublines, and (iii) an unconstrained model with *a priori*  
308 independent values of  $s$  and  $h$  before the subline split and in each subline after the split.

309 With our ABC approach, we first sampled an evolutionary model and values of  $s$  and  $h$   
310 from their prior distributions and then simulated evolution forward in time from the parental

311 generation of L14 to generation F16 in sublines A and B while allowing for genetic drift (which  
312 was parameterized by the relevant estimate of  $N_e$ ) and selection (this combines equation 1.24  
313 from Ewens, 2012 with binomial sampling for genetic drift; see details below and in Fig. 2).  
314 We assigned a prior probability of  $\frac{1}{3}$  to each model of constraint (i.e., consistency) in selection  
315 over time and between sublines (Fig. 2). We assumed a prior distribution on selection ( $s$ )  
316 that was a 50:50 mixture of two Gaussian distributions both with a mean of 0, but one with  
317 a modest standard deviation of 0.3 and one with a very small standard deviation of 0.007  
318 (the latter was  $\approx \frac{1}{2N_e}$  in the post-bottleneck lentil line). This is akin to a spike-and-slab  
319 prior, and allows for moderately intense selection while still conservatively putting most of  
320 the prior density for  $s$  near 0 (as in, Gompert & Messina, 2016). The heterozygote effect  
321 was assigned a uniform prior over the interval (0,1) (see “Sensitivity to model assumptions”  
322 for an assessment of the sensitivity of our results to prior assumptions).

323 In the ABC simulations, the expected allele frequency (due to selection) in each sub-  
324 sequent generation,  $t + 1$ , was calculated as  $p^* = p_t + \frac{p_t^2 w_{11} + p_t(1-p_t)w_{12} - p_t \bar{w}}{\bar{w}}$ , where  $\bar{w}$  denotes  
325 the mean fitness of the population. We then accounted for genetic drift around this expecta-  
326 tion by sampling  $p_{t+1} \sim \text{binomial}(p^*, 2N_e)/2N_e$ . ABC simulations were implemented in our  
327 own computer program (`wfabcdyn`, version 0.1) written in C++ using the Gnu Scientific Li-  
328 brary (Gough, 2009). Simulation output comprised the full vector of allele frequencies across  
329 generations and sublines, which we then compared to the analogous allele frequency vector  
330 containing the observed data for each locus. As is standard with ABC methods, posterior  
331 distributions for  $s$  and  $h$  were generated by retaining (and correcting, see below) the set of  
332 parameter values that best recreated the observed allele frequency vector.

333 We based inferences of  $s$  and  $h$  for each of the 198 SNPs on five million simulations.  
334 The non-reference allele frequency for each SNP in the L14 founder generation (P) was  
335 used to initialize each simulation. We retained the sampled parameter values from the  
336 0.02% of simulations (1000 samples, which provides a reasonable amount of information  
337 about the posterior distribution) that generated allele frequency vectors with the smallest

338 Euclidean distance to the observed allele frequency vector (across sublines and generations).  
339 We then corrected these sampled parameter values by adjusting them towards the true  
340 posterior distribution using a weighted local linear regression (Beaumont *et al.*, 2002). This  
341 was done with the `abc` function in the R `abc` package (version 2.1) (Csilléry *et al.*, 2012).  
342 Model posterior probabilities were calculated using a simple rejection method, and posterior  
343 probabilities of  $s$  and  $h$  integrated over uncertainty in the best model except where noted  
344 otherwise. Simulations were used to assess the precision and accuracy of selection coefficient  
345 estimates with our ABC framework (see “Evaluation of the ABC approach” and Figs. S4  
346 and S5 in the OSM).

347       Estimates of  $s$  were designated as credibly different from zero when the 95% equal-  
348 tail probability intervals (ETPIs) of the relevant posterior distribution did not overlap zero.  
349 Cases where this was not true do not constitute evidence of neutral evolution, but rather  
350 indicate that we cannot confidently distinguish among three possibilities: neutral evolution,  
351 selection favoring the non-reference allele, and selection favoring the reference allele. Com-  
352 parisons of selection coefficients between sublines or time intervals were used to measure the  
353 consistency of selection during the L14 evolutionary rescue event and were made by calculat-  
354 ing Pearson correlation coefficients ( $r$ ). Rather than basing these calculations on the point  
355 estimates of  $s$ , we obtained posterior distributions for  $r$  by integrating over uncertainty in  $s$   
356 (i.e., by calculating  $r$  for each posterior sample of  $s$ ). Thus, uncertainty in  $s$  was propagated  
357 to downstream summary analyses.

## 358 **Estimating genomic change and selection in lines L1, L2, L3 and** 359 **L11**

360 We quantified patterns of genomic change and selection in the long-established lentil lines  
361 (L1-L3) and in the new line that failed to undergo evolutionary rescue and establish on  
362 lentil (L11), and compared these to patterns of change and selection in L14. Because of the

363 idiosyncratic nature of these comparisons (L1-L3 were analyzed long after rescue, and L11  
364 failed to adapt), it was not possible to measure the repeatability of genome-wide evolutionary  
365 dynamics during rescue. In other words, we could not assess the repeatability of rates or  
366 temporal patterns of genomic change, or of the intensity of selection on individual loci.  
367 Rather, we made these comparisons to ask whether the outcome of lentil adaptation in L1,  
368 L2 and L3, and/or initial patterns of change in the doomed L11 line mirrored the patterns  
369 of genomic change and selection (in terms of direction and relative, not absolute, intensity)  
370 observed during evolutionary rescue in L14. An affirmative answer would suggest a degree of  
371 repeatability for the dynamics of genomic change during evolutionary rescue (or, even more  
372 generally, when using lentil regardless of whether rescue is successful), and thus could serve  
373 as a basis for future work. Our analyses of L1-L3 and L11 focused on the 198 focal SNPs  
374 from the L14 line (only 188 of these were variable in L1-L3, and thus only that subset was  
375 considered for those lines).

376         Selection coefficients were estimated in the long-established lentil lines (L1-L3) using  
377 a modified version of the method described above. First, since the mung-bean source line  
378 was sampled contemporaneously with the long-established lentil lines rather than at the  
379 point in time when the lentil lines were founded, we first simulated evolution by genetic drift  
380 backwards in time from the contemporary M14 sample to the mung-bean source population of  
381 each lentil line. We used this as a starting point for forward-in-time simulations of evolution  
382 by selection and drift in each lentil line (this assumes neutral evolution in the source south  
383 Indian line on mung only, not in the lentil lines; see “Alternative ABC models” in the OSM  
384 and Gompert & Messina, 2016 for additional details). Variance effective population sizes  
385 from Gompert & Messina (2016) were used for these simulations. Values of  $s$  and  $h$  were  
386 sampled from their prior distributions and the 0.02% of simulations that best matched the  
387 observed data were retained as described for L14, but in this case we compared only the  
388 final allele frequency in L1 F100, L2 F87 and L3 F85 with the simulated value after 100,  
389 87 or 85 generations of evolution (we lack genetic data from the early stages of adaptation



390 in these lines). Because this constraint greatly reduced the dimensionality of the summary  
391 statistics, many simulations gave exact matches to the observed data. This result caused  
392 the local linear regression to fail, but also made this correction unnecessary. Hence, we used  
393 simple rejection to obtain the posterior distributions of  $s$  for L1, L2 and L3.

394 We similarly focused on the final allele frequency for the L11 line, which in this case  
395 was in the F4 generation (see “Alternative ABC models” in the OSM for details). However,  
396 we were able to use a contemporary sample from the south Indian line (the L14 founders) as  
397 the source for L11, and thus did not perform the backwards in time simulation of drift (this  
398 sample was taken from the south Indian line within a few months of the time that L11 was  
399 founded, and thus any drift would be negligible). Comparisons of selection coefficients across  
400 lines (L1-L3, L11, and L14) were then used to assess the repeatability of genomic change on  
401 lentil, and were made by calculating Pearson correlation coefficients ( $r$ ) as described in the  
402 preceding section.

## 403 Results

### 404 Fitness assays

405 Survival from egg hatch to adult emergence from lentil seeds was low as expected in the  
406 source mung bean population ( $\sim 1\%$ ) (Fig. 1c). Yet survival had risen to 69.2% by the F5  
407 generation. Subsequent to the subline split, survival assays were only conducted in subline  
408 A. At generation F10, survival had further increased to 90.2%, and remained high (91.8%)  
409 at the F20 generation (subline A). This pattern of rapid adaptation thus closely resembled  
410 those observed earlier in the L1-L3 lines (Fig. 1c; Messina *et al.*, 2009b).

## 411 **Patterns of allele frequency change and LD in the L14 line**

412 We observed substantial evolutionary change over the course of the experiment, with an  
413 average net allele frequency change between generations P and F16 of 0.155 in subline A (SD  
414 = 0.150) and 0.159 in subline B (SD = 0.155). Average expected heterozygosity also declined  
415 over time, from 0.274 (SD = 0.169) in generation P to 0.246 (SD = 0.183) in generation F4,  
416 and finally to 0.222 (SD = 0.187; subline A) or 0.220 (SD = 0.174; subline B) in the F16  
417 generation (all standard errors  $\approx 0.001$ ) (Fig. S6). Consistent with the observed decline in  
418 diversity and the census population bottleneck, the variance effective population size was  
419 quite low initially ( $\hat{N}_e$  for P to F4 = 8.82, 95% equal-tail probability intervals [ETPIs] =  
420 8.60–9.04; Table 1). Variance effective population sizes then increased between generations  
421 F4 and F16 to 68.92 (95% ETPIs = 66.69–71.05) and 56.77 (95% ETPIs = 55.25–58.35)  
422 in sublines A and B, respectively. Even in the parental generation, LD was high between  
423 nearby SNPs ( $r^2 = 0.369$  for SNPs <100 bp apart), and modest out to 500 kb ( $r^2 = 0.152$ )  
424 (Table S1, Fig. S7). On average, LD increased over the course of the experiment, although  
425 the upper percentiles of the LD distribution reached their maximum by the F4 generation  
426 before declining in both sublines.

427 Considerably greater evolutionary change was observed for the 198 SNPs with signif-  
428 icant deviations from the null genetic drift model (i.e., the focal SNPs). For these SNPs, the  
429 average net allele frequency change over the experiment (from P to F16) was 0.611 in subline  
430 A (range = 0.004–0.973) and 0.616 in subline B (range = 0.018–0.980) (Figs. 3, S8, Table  
431 S2). Many of these SNPs exhibited substantial allele frequency change in a single generation,  
432 with a mean (across SNPs), maximum single-generation change of 0.446 (range across SNPs  
433 = 0.175–0.745). For 70.7% of these SNPs the maximum change occurred between the F2  
434 and F3 generation (the mean absolute change for this generation was 0.370). By the F16  
435 generation, the initially rarer allele (i.e., the minor allele) had reached a frequency of > 0.90  
436 at 64.1% of these SNPs, and > 0.98 for 29.2% (subline A) or 22.2% (subline B) of them. Fre-  
437 quency changes during the first four generations were only modestly correlated with changes

438 after the formation of the the two sublines ( $r_{P-F4,F4-F16A} = 0.127$ , 95% confidence inter-  
439 val [CI] = -0.012–0.262 ;  $r_{P-F4,F4-F16B} = 0.234$ , 95% CI = 0.098–0.362), while evolutionary  
440 changes between sub-lines after the split showed high levels of parallelism ( $r_{F4-F16A,F4-F16B}$   
441 = 0.743, 95% CI = 0.674–0.800; Fig. S9).

442 The 198 focal SNPs did not evolve independently, but instead were organized into  
443 clusters of high LD loci that exhibited similar patterns of allele frequency change (Figs.  
444 3, 4, S10). We identified 16 and 10 clusters of high LD SNPs in the L14–P and L14–F1,  
445 respectively, which were reorganized into six high LD clusters by the F4 generation. LD  
446 within clusters was considerably higher than LD among clusters (e.g., mean  $r^2$  within,  $r_W^2$   
447 = 0.209, versus mean among,  $r_A^2 = 0.023$  in L14–F4; Fig. 4). Despite the fragmented nature  
448 of our reference genome (Fig. S1), we found that cluster membership was consistent with  
449 physical proximity, such that SNPs on the same scaffold were more likely to be assigned  
450 to the same cluster ( $p < 0.001$  based on a randomization test in L14–F1). With that said,  
451 patterns of LD and cluster membership shifted over the experiment, particularly during the  
452 first four generations (Fig. 4b), such that pairwise LD in generations F1 and F4 were only  
453 modestly correlated ( $r_{F1,F4} = 0.199$ ). Patterns of LD changed less after that; the correlations  
454 in pairwise LD between F4 and L14A–F16 and L14B–F16 were  $r_{F4,F16A} = 0.605$  and  $r_{F4,F16B}$   
455 = 0.569, respectively.

## 456 **Strength and consistency of natural selection in the L14 line**

457 For most SNPs, constrained and unconstrained models of selection had similar posterior  
458 probabilities (Fig. S11). Consequently, rather than focus on a specific model, we report  
459 model-averaged selection coefficients. Consistent with the observed patterns of allele fre-  
460 quency change, selection coefficients were large on average, especially during the early stages  
461 of adaptation (i.e., from L14–P to L14–F4) (allele frequency change and estimates of selec-  
462 tion were strongly correlated, with  $r > 0.8$ ; Fig. S12). In particular, the average intensity of  
463 selection was 0.388 in L14 from P to F4, and 0.207 and 0.211 in sublines A and B between

464 the F4 and F16 generations (Fig. 5) (see Figs. S13, S14, S15, S16, S17 and S18 and text  
465 in the OSM for results using different priors). Of these 198 SNPs, we detected a credible  
466 effect of selection (that is, 95% ETPIs for  $s$  not overlapping zero) in 53 SNPs from six of  
467 ten LD clusters during the early phase of adaptation (from P to F4), and 53 and 51 SNPs  
468 from four of ten LD clusters during the later stage of adaptation (F4-F16) in sublines A and  
469 B, respectively (here we define LD clusters based on patterns of LD in L14–F1; some but  
470 not all of these clusters had a credible effect of selection in both early and later stages of  
471 adaptation; Fig. 6). Nearly all credible estimates of  $s$  were negative, implying selection for  
472 the non-reference allele, which was generally the minor allele (Fig. 5). Estimates of  $h$  (the  
473 heterozygote effect) were associated with considerable uncertainty, but there was a slight  
474 signal of an overall negative correlation between  $s$  and  $h$  (see “Heterozygous effect”, Table  
475 S3 and Figs. S19 and S20 in the OSM for details).

476 Only five and seven SNPs had credible effects of selection during both time periods for  
477 sublines A and B, respectively (Fig. 6a,b). Nevertheless, estimates of  $s$  during early (between  
478 P and F4) and late (from F4 to F16) adaptation were moderately correlated ( $r_{P-F4,F4-F16A}$   
479 = 0.489, 95% ETPIs = 0.373–0.587;  $r_{P-F4,F4-F16B}$ =0.499, 95% ETPIs = 0.387– -0.592)  
480 (Table S4). Moreover, we never detected credible effects of selection with opposite signs  
481 between time periods. We obtained similar results when we based our inferences only on the  
482 fully unconstrained model (see “Sensitivity to model assumptions” and Figs. S18 and S21  
483 and Table S5 in the OSM for details). We detected much greater consistency in estimates of  
484  $s$  between the two sublines during the later stages of adaptation ( $r_{F4-F16A,F4-F16B}$ =0.857,  
485 95% ETPIs = 0.753–0.914; Fig. 6c) than between time periods. Forty SNPs had credible  
486 effects of  $s$  in both sublines, and always with the same sign.

## 487 Comparisons with other lines

488 On average, estimates of  $s$  were lower for the long-established lentil lines with means of  
489 0.067, 0.103 and 0.022 in L1, L2 and L3, respectively. Lower estimates of  $s$  are expected,

490 as patterns of change were averaged over longer periods of time and thus weaker selection  
491 over a longer period of time could explain the observed changes (this effect was evident in  
492 Gompert & Messina, 2016). Similar numbers of SNPs had values of  $s$  credibly different from  
493 zero (43 in L1, 55 in L2, and 10 in L3). Correlations in selection coefficients among the three  
494 long-established lines ranged from 0.094 to 0.262, and were thus considerably lower than  
495 correlations in selection between L14 sublines or time intervals (Fig. 7, S22). There was an  
496 even weaker association between selection in the L14 and any of the long-established lentil  
497 lines, with correlations in selection ranging from -0.024 to 0.050 (Table S4). Correlations in  
498 patterns of allele frequency change among L1, L2 and L3 and between these lines and L14  
499 were generally consistent with correlations in selection coefficients, with moderate correla-  
500 tions in change among L1-L3 ( $r=0.366- -0.653$ ), and much weaker correlations between L14  
501 and these lines ( $r =-0.071- -0.123$ ) (Fig. S9).

502         Compared to the L14 line, we detected much less evolutionary change genome-wide  
503 in L11 from generation P to F4, with a mean absolute change of 0.053 (SD = 0.050; mean  
504 heterozygosity in L11 F4 was 0.276). Consistent with the lack of genomic change, the variance  
505 effective population size of this line was considerably higher than it was for L14 during the  
506 same time period,  $N_e = 134.2$  (95% ETPIs = 127.2–141.9) (compare to Table 1). This  
507 pattern of limited allele frequency change held for the 198 focal SNPs as well (mean change  
508 = 0.085, SD = 0.0676), and patterns of allele frequency change at these SNPs were mostly  
509 unrelated to patterns of changes in other lines (most  $r = -0.121- -0.093$ ) (Fig. S9). The only  
510 exception was for the comparison with change between the L14 founder (P) and L14 F4, with  
511  $r_{L11,L14P-F4} = 0.305$  (95% CIs = 0.173–0.426). Consistent with the the lack of evolutionary  
512 change, we found little evidence of selection affecting the focal SNPs with a mean estimate  
513 of  $s = 0.002$ , and only two SNPs with credible evidence of selection. Likewise, estimates of  $s$   
514 in L11 were mostly independent of estimates of  $s$  in the other lines ( $r = -0.032-0.023$ , with  
515 all 95% CIs spanning 0) (Figs. 7, S22, Table S4).

## 516 Discussion

517 Many important questions in molecular ecology, such as those concerning the evolution of  
518 range limits, population persistence in human-altered environment, and the evolution of  
519 antibiotic/herbicide/insecticide resistance, focus on cases where adaptation might or might  
520 not prevent local extirpation or extinction, that is, cases of potential evolutionary rescue.  
521 Thus, a better understanding of not only the factors affecting the probability of rescue, but  
522 also of the genetic basis and dynamics (i.e., patterns and rates of change) of evolutionary  
523 rescue is broadly relevant to this field. Here, using an evolve-and-resequence approach with  
524 fine-scale temporal resolution, we have shown that evolutionary rescue in *C. maculatus* on  
525 lentil can occur via rapid evolutionary changes at multiple loci. We observed exceptionally  
526 rapid and pronounced evolution during the first four generations on lentil, with an average  
527 maximum rate of allele frequency change of 0.446 in a single generation for a set of 198 focal  
528 SNPs.

529 We found evidence of very strong selection on the 198 focal loci during this experi-  
530 ment, with an average intensity of (direct plus indirect) selection on these loci ranging from  
531  $|s| = 0.207$  to  $|s| = 0.388$  (depending on the subline and time interval) (Fig. 5). Although this  
532 magnitude of selection is much stronger than is commonly assumed in population-genetic  
533 theory, it is consistent with strong selection detected in other systems, such as sticklebacks  
534 (Barrett *et al.*, 2008), phlox (Hopkins & Rausher, 2012), flies (Cardoso-Moreira *et al.*, 2016)  
535 and stick insects (Gompert *et al.*, 2014a; Nosil *et al.*, 2018), as well as with the observed  
536 rapid rise in survival of *C. maculatus* on lentil (Fig. 3). Thus, our work further highlights  
537 the importance of developing population-genetic theory with a greater emphasis on strong  
538 selection and rapid adaptation, especially in populations that colonize stressful or novel en-  
539 vironments (e.g., Gompert, 2016; Messer *et al.*, 2016). We also found that different sets  
540 of loci were associated with the very early (i.e., F1-F4) versus later (i.e., F4-F16) stages  
541 of adaptation to lentil. In other words, patterns of selection varied considerably even over

542 the relatively short time scale of this experiment. In contrast, we observed extreme par-  
543 allelism ( $r = 0.857$ ) in patterns of selection and evolutionary change in sublines that were  
544 separated after the L14 population recovered from an initial bottleneck (Fig. 6c). In the  
545 following sections, we discuss these findings in more detail, contrast our core results from  
546 L14 with patterns changes in other independently-derived lines (i.e., L1, L2, L3 and L11),  
547 and highlight important caveats related to our findings.

## 548 **The genetic architecture and evolutionary dynamics of rescue**

549 Survival rates on lentil increased from  $\sim 1\%$  to over 90% in just 10 generations (i.e., survival  
550 rates increased  $\sim 90$ -fold over a short period of time; Fig. 1c). During this time, the new  
551 lentil line (L14) went through a severe bottleneck with the variance effective population size  
552 ( $N_e$ ) dropping to fewer than 10 individuals before rebounding. This demographic rebound  
553 was likely driven by adaptive evolutionary changes at (i) several to tens of causal loci, or  
554 (ii) a similar number of sets of tightly linked mutations with smaller individual effects on  
555 fitness (e.g., Linnen *et al.*, 2013). In particular, we detected very strong selection (combined  
556 direct and indirect) affecting  $>100$  SNP markers, which were organized into 6–16 high LD  
557 clusters. We hypothesize that each cluster comprises SNPs in LD with one or more distinct  
558 causal variants. If we are correct, our results suggest that rapid adaptation to lentil is driven  
559 by strong selection on oligogenic to moderately polygenic variation (as in Orr, 2005 and  
560 Bell & Gonzalez, 2009), similar to adaptation to freshwater in marine sticklebacks (Jones  
561 *et al.*, 2012; Lescak *et al.*, 2015). This is consistent with theory predicting a greater role for  
562 mutations of large effect (and fewer total genes/gene regulatory regions) during the early  
563 stages of adaptation, particularly when a population is far from a phenotypic optimum, as  
564 might commonly occur in cases of evolutionary rescue (Orr, 2005; Bell, 2017). However, we  
565 will have underestimated the number of causal loci if (i) some causal loci were not in LD  
566 with any of our SNPs, or (ii) if multiple causal loci were in high LD with the same SNPs.  
567 Consequently, we cannot exclude a more highly polygenic basis for evolutionary rescue.

568 Likewise, because we were conservative in our tests for selection, we likely missed some or  
569 even many loci with smaller effects on fitness.

570         The minor allele at more than 100 SNPs reached a frequency >90% within 16 gen-  
571 erations (and in some cases within five generations) (Fig. 3). While we lack data on the  
572 underlying causal variants, we can assume that such variants evolved at least this rapidly  
573 during the same time period, as direct selection on a causal variant should generally exceed  
574 indirect selection on a marker locus in LD with that variant (e.g., Gompert, 2016; Gompert  
575 *et al.*, 2017). We think this constitutes evidence that selection on standing genetic varia-  
576 tion fixed or nearly fixed alleles (or haplotypes) at many of these causal loci. Our results  
577 differ from other recent evolve-and-resequence experiments in eukaryotes (mostly involving  
578 *Drosophila*) where adaptation occurred by more subtle shifts in allele frequencies and in-  
579 complete selective sweeps (Burke *et al.*, 2010; Orozco-terWengel *et al.*, 2012; Burke *et al.*,  
580 2014; Tobler *et al.*, 2014; Graves Jr *et al.*, 2017) (but see, Michalak *et al.*, 2018). For ex-  
581 ample, in an experiment where flies evolved under novel laboratory conditions with elevated  
582 and fluctuating temperatures, SNPs that showed the most pronounced evolutionary change  
583 during the first 15 generations of evolution (median change = 0.28), exhibited little allele  
584 frequency change after that (median change = 0.03) with only only 9% reaching a frequency  
585 >0.9 after 37 generations (Orozco-terWengel *et al.*, 2012). Similarly, a highly replicated  
586 study of *Drosophila* populations selected for development time found little or no evidence of  
587 hard/complete selective sweeps even after >800 generations of evolution (Graves Jr *et al.*,  
588 2017).

589         We think these differences can be explained by the harshness of the experimental  
590 environment, and by the related demographic consequences of the imposed environmental  
591 shift. When the Indian *C. maculatus* population is shifted onto lentil, absolute mean fitness  
592 is initially extremely low, and population decline occurs. In contrast, the experimental  
593 environments in the *Drosophila* studies described above (e.g., accelerated culture conditions,  
594 altered rearing temperatures, etc.) did not depress absolute mean fitness enough to cause



595 population decline, and thus were arguably more benign. We hypothesize that *C. maculatus*  
596 beetles transferred to lentil are far from a fitness peak (relative to the situation in the  
597 *Drosophila* studies), such that selection continues to favor the same alleles until they fix  
598 (i.e., selection does not transition from directional to stabilizing before fixation). Genetic  
599 drift during the initial population bottleneck might have also contributed to the fixation of  
600 advantageous alleles during our experiment once they became relatively common.

601         Despite the constant host environment during the experiment, selection on individual  
602 loci varied across generations, particularly in terms of the magnitude (but not direction) of  
603 selection. Several complementary explanations may account for this observation. First, given  
604 the observed patterns of allele frequency change at the SNP markers, some causal variants  
605 likely fixed or nearly fixed within the first five generations. After this, selection on these  
606 variants would have ceased, thereby reducing or eliminating selection on linked SNP markers.  
607 Second, epistatic interactions could have altered the marginal fitness effects of causal variants  
608 as allele frequencies changed. Epistatic interactions have previously been shown to play an  
609 important role in adaptation in several species, including mice (Steiner *et al.*, 2007), yeast  
610 (Ono *et al.*, 2017), and bacteria (Arnold *et al.*, 2018), and future work mapping the genetic  
611 basis of host-specific performance or fecundity traits in adapted/maladapted *C. maculatus*  
612 could test for epistasis in this system. Third, direct selection on causal variants could be  
613 constant, but indirect selection on our SNP markers could shift as allele frequencies and LD  
614 evolve. Given the major shifts we see in patterns of LD, this is almost certainly part of the  
615 reason for the variable strength of selection over time. Lastly, some sources of selection could  
616 be density dependent. Male-male competition is common in high-density populations of *C.*  
617 *maculatus* (Hotzy & Arnqvist, 2009), and larvae from our Indian source population exhibit  
618 particularly strong contest competition within seeds (Messina, 1991; Fox & Messina, 2018).

## 619 **Low repeatability of genomic change on lentil**

620 Because we documented the full course of evolutionary rescue in the L14 line (even if adap-  
621 tation was ongoing, the population had been rescued from extinction), patterns of genomic  
622 change in the L14 experiment provide direct insights into the population genetic/genomic  
623 processes associated with rescue. In contrast, even non-neutral genetic differences between  
624 each of the long-established lentil lines (L1-L3) and the source south Indian population in-  
625 clude a mixture of adaptive changes that occurred during rescue and adaptive changes that  
626 occurred after rescue was complete, and any adaptive evolutionary change that occurred in  
627 L11 was insufficient to rescue the line from extinction. Thus, we cannot ask whether the  
628 SNPs that changed most (and thus were most likely affected by selection) in L14 during  
629 rescue followed similar dynamics in other lines (e.g., similar rates and directions of change  
630 and in the same temporal sequence). However, we were able to ask whether SNPs associated  
631 with rescue in L14 showed overall patterns of change in the other lines that were at least  
632 consistent with being associated with (partial) adaptation to lentil. An affirmative answer  
633 would imply that evolution on lentil is repeatable at the genetic level (at least to a degree  
634 and without a focus on dynamics per se), perhaps even in cases where extinction occurs.

635 This was not what we observed. Instead, total allele frequency change and estimates of  
636 selection for the 198 focal SNPs in L1, L2, L3 and L11 were mostly independent of patterns of  
637 change and selection in L14 (Figs. 3, 7). The only notable exception was for allele frequency  
638 change in L11, which exhibited a modest ( $r = 0.305$ ) but significant correlation with change  
639 during the during the first four generations of L14 on lentil (Fig. 3). Thus, there is some,  
640 albeit limited, evidence that the evolutionary path L11 followed was not wholly independent  
641 of the path followed by L14, even though changes were much larger in the latter and resulted  
642 in rescue (we discuss this more below). We also detected greater consistency in patterns  
643 of genomic change among the three long-established lentil lines (consistent with Gompert  
644 & Messina, 2016), than between any of these and L14. This can perhaps be explained by  
645 evolutionary changes within the south Indian mung bean line. Evolutionary changes within

646 the source mung bean line could have likely altered the standing genetic variation initially  
647 available for adaptation to lentil in each line. Given the moderately high variance effective  
648 population size in this source line ( $N_e = 1149$ ; Gompert & Messina, 2016) and the fact that  
649 the population has been kept on the same host for >1000 generations, we expected minimal  
650 evolution within this line. Nonetheless, it is clearly still evolving. L2 and L3 were formed  
651 within just a few generations of each other, and L1 was started about 20 generations before  
652 that (Messina *et al.*, 2009b; Gompert & Messina, 2016).

653         Interestingly, rates of evolutionary change were much lower in the failed L11 line than  
654 over the comparable number of generations in the successful L14 line. Likewise, and despite  
655 the fact the census sizes of both lines were both reduced to a few hundred adult beetles, the  
656 variance effective population size in L11 ( $\sim 134$ ) was considerably higher than in L14 ( $\sim 9$ ).  
657 This difference suggests that variation in fitness was greater in L14 than in L11 (leading to a  
658 lower variance effective population size in L14), and is consistent with the observed pattern  
659 of rapid adaptation to lentil in L14 and the lack (or limited nature) of adaptation to lentil  
660 in L11. Determining whether such differences in variance effective population size generally  
661 distinguish cases where evolutionary rescue does or does not occur will require future work  
662 with replicated cases of successful and failed rescue.

## 663 **Conclusions**

664 We documented rapid adaptation to a stressful host by seed beetles, and showed that it  
665 was associated with exceptionally rapid evolutionary change at numerous loci. This result  
666 does not mean that all (or any) of the focal SNPs drove adaptation to lentil. Instead, these  
667 SNPs were in LD clusters associated with the actual causal variants and thus were likely  
668 affected by selection indirectly. Nevertheless, this study shows how a population can rapidly  
669 adapt from standing variation at multiple loci across the genome, resulting in a 45 to 90-fold  
670 increase in survival and evolutionary rescue from extinction in as few as 10 generations. By  
671 showing what is possible, our results might help explain colonization of extreme or stressful

672 environments in nature (Kawecki, 2008), including rare shifts onto marginal host plants in  
673 phytophagous insects such as the occasional use of lentil by *C. maculatus* (Credland, 1987,  
674 1990).

675         In terms of the evolution of increased survival rates, successful cases of evolutionary  
676 rescue of *C. maculatus* on lentil exhibit highly repeatable dynamics (Fig. 1c). However, this  
677 was not generally true at the genetic level, with the notable exception of parallel (repeatable)  
678 changes in the two L14 sublines (Fig. 6). Similar differences in repeatability at genetic and  
679 phenotypic levels has been documented in a variety of systems (Blount *et al.*, 2018). Beyond  
680 this, some of this variation in repeatability of adaptation to lentil at the genetic level likely  
681 stems from differences in shared genetic variation available for selection across these cases  
682 (as has also been seen in evolve-and-resequence studies in *Drosophila*; Seabra *et al.*, 2017).  
683 Because lentil is a very stressful host, each *C. maculatus* line went through a severe bottleneck  
684 when it was shifted onto lentil (Gompert & Messina, 2016). Thus, the subset of adaptive  
685 genetic variation (or adaptive gene combinations) available for selection in each line was  
686 likely quite different (e.g., Charlesworth, 2009; Tinghitella *et al.*, 2011), which can limit  
687 repeatability at the genetic level. These results suggest that the early stages of adaptation  
688 to lentil exhibit chaotic dynamics, in the sense that evolutionary trajectories of alleles during  
689 this time period are sensitive to initial conditions (i.e., to the specific adaptive alleles present,  
690 their frequencies and patterns of LD) (e.g., Rego-Costa *et al.*, 2018), and that stochastic  
691 variation in initial conditions (due to the demographic bottleneck) expose this sensitivity.  
692 The evolutionary consequences of this sensitivity to initial conditions could be amplified by  
693 epistatic interactions among alleles that contribute to early and later stages of adaptation  
694 (e.g., Lagator *et al.*, 2014). Whether this occurs in *C. maculatus* is unknown, but genetic  
695 crosses could be used to detect lentil performance/preference QTL with epistatic effects and  
696 thereby test this hypothesis. Finally, even in the absence of bottlenecks, repeatability at the  
697 genetic level could be low if many redundant loci offer alternative routes for adaptation to  
698 lentil, and this could further explain our results.

699 In conclusion, our results suggest that demographic history can be a key determinant  
700 of the extent of parallel evolution at the genetic level, and that bottlenecks could decrease  
701 the repeatability of genomic change in cases of evolutionary rescue by exposing chaos. Con-  
702 sequently, understanding the repeatability/predictability of evolution might require consid-  
703 ering both ecological (e.g., demographic) and evolutionary processes and a better integration  
704 of eco-evolutionary thinking throughout evolutionary biology (e.g., Hendry, 2016).

## 705 Acknowledgments

706 This manuscript was improved by comments on earlier drafts by J. Fordyce, L. Lucas, C.  
707 Nice, P. Nosil, T. Saley, A. Springer, and several anonymous reviewers. We thank C. Bour-  
708 geois, S. Thelen, and C. Willden for technical assistance. This research was supported by  
709 the Utah Agricultural Experiment Station, Utah State University (UAES paper number  
710 9119). The support and resources from the Center for High Performance Computing at the  
711 University of Utah are gratefully acknowledged.

## 712 Literature Cited

713 Agashe D (2009) The stabilizing effect of intraspecific genetic variation on population dy-  
714 namics in novel and ancestral habitats. *The American Naturalist*, **174**, 255–267.

715 Agashe D, Falk JJ, Bolnick DI (2011) Effects of founding genetic variation on adaptation to  
716 a novel resource. *Evolution*, **65**, 2481–2491.

717 Antonio-Nkondjio C, Fossog BT, Kopya E, *et al.* (2015) Rapid evolution of pyrethroid resis-  
718 tance prevalence in anopheles gambiae populations from the cities of Douala and Yaoundé  
719 (Cameroon). *Malaria Journal*, **14**, 155.

- 720 Arnold BJ, Gutmann MU, Grad YH, *et al.* (2018) Weak epistasis may drive adaptation in  
721 recombining bacteria. *Genetics*, **208**, 1247–1260.
- 722 Barrett RD, Rogers SM, Schluter D (2008) Natural selection on a major armor gene in  
723 threespine stickleback. *Science*, **322**, 255–257.
- 724 Barrick JE, Yu DS, Yoon SH, *et al.* (2009) Genome evolution and adaptation in a long-term  
725 experiment with *Escherichia coli*. *Nature*, **461**, 1243–1247.
- 726 Beaumont MA, Zhang W, Balding DJ (2002) Approximate Bayesian computation in popu-  
727 lation genetics. *Genetics*, **162**, 2025–2035.
- 728 Behrman EL, Howick VM, Kapun M, *et al.* (2018) Rapid seasonal evolution in innate im-  
729 munity of wild *Drosophila melanogaster*. *Proc. R. Soc. B*, **285**, 20172599.
- 730 Bell G (2013) Evolutionary rescue and the limits of adaptation. *Philosophical Transactions*  
731 *of the Royal Society B*, **368**, 20120080.
- 732 Bell G (2017) Evolutionary rescue. *Annual Review of Ecology, Evolution, and Systematics*,  
733 **48**, 605–627.
- 734 Bell G, Gonzalez A (2009) Evolutionary rescue can prevent extinction following environmen-  
735 tal change. *Ecology Letters*, **12**, 942–948.
- 736 Bergland AO, Behrman EL, O’Brien KR, Schmidt PS, Petrov DA (2014) Genomic evidence  
737 of rapid and stable adaptive oscillations over seasonal time scales in *Drosophila*. *PLoS*  
738 *Genetics*, **10**, e1004775.
- 739 Blount ZD, Borland CZ, Lenski RE (2008) Historical contingency and the evolution of a key  
740 innovation in an experimental population of *Escherichia coli*. *Proceedings of the National*  
741 *Academy of Sciences*, **105**, 7899–7906.
- 742 Blount ZD, Lenski RE, Losos JB (2018) Contingency and determinism in evolution: Replay-  
743 ing life’s tape. *Science*, **362**, eaam5979.

- 744 Buerkle CA, Gompert Z (2013) Population genomics based on low coverage sequencing: how  
745 low should we go? *Molecular Ecology*, **22**, 3028–3035.
- 746 Burke MK, Dunham JP, Shahrestani P, Thornton KR, Rose MR, Long AD (2010) Genome-  
747 wide analysis of a long-term evolution experiment with *Drosophila*. *Nature*, **467**, 587–590.
- 748 Burke MK, Liti G, Long AD (2014) Standing genetic variation drives repeatable experimental  
749 evolution in outcrossing populations of *Saccharomyces cerevisiae*. *Molecular Biology and*  
750 *Evolution*, **31**, 3228–3239.
- 751 Cardoso-Moreira M, Arguello JR, Gottipati S, Harshman LG, Grenier JK, Clark AG (2016)  
752 Evidence for the fixation of gene duplications by positive selection in *Drosophila*. *Genome*  
753 *Research*, **26**, 787–798.
- 754 Charlesworth B (2009) Effective population size and patterns of molecular evolution and  
755 variation. *Nature Reviews Genetics*, **10**, 195–205.
- 756 Cook L, Saccheri I (2013) The peppered moth and industrial melanism: evolution of a natural  
757 selection case study. *Heredity*, **110**, 207–213.
- 758 Credland PF (1987) Effects of host change on the fecundity and development of an un-  
759 usual strain of *Callosobruchus maculatus* (F.)(Coleoptera: Bruchidae). *Journal of Stored*  
760 *Products Research*, **23**, 91–98.
- 761 Credland PF (1990) Biotype variation and host change in bruchids: Causes and effects  
762 in the evolution of bruchid pests. In: *Bruchids and Legumes: Economics, Ecology and*  
763 *Coevolution* (eds. Fujii K, Gatehouse AMR, Johnson CD, Mitchel R, Yoshida T), pp.  
764 271–287, Springer Netherlands, Dordrecht.
- 765 Csardi G, Nepusz T (2006) The igraph software package for complex network research.  
766 *InterJournal, Complex Systems*, 1695.

- 767 Csilléry K, François O, Blum MG (2012) abc: an R package for approximate Bayesian  
768 computation (ABC). *Methods in Ecology and Evolution*, **3**, 475–479.
- 769 Egan SP, Ragland GJ, Assour L, *et al.* (2015) Experimental evidence of genome-wide impact  
770 of ecological selection during early stages of speciation-with-gene-flow. *Ecology Letters*, **18**,  
771 817–825.
- 772 Elmer KR, Fan S, Kusche H, *et al.* (2014) Parallel evolution of Nicaraguan crater lake cichlid  
773 fishes via non-parallel routes. *Nature Communications*, **5**, 5168.
- 774 Ewens WJ (2012) *Mathematical Population Genetics I: Theoretical Introduction*, vol. 27.  
775 Springer Science & Business Media.
- 776 Fisher RA (1938) *The Genetical Theory of Natural Selection*. Oxford University Press.
- 777 Foll M, Shim H, Jensen JD (2015) WFABC: a Wright–Fisher ABC-based approach for infer-  
778 ring effective population sizes and selection coefficients from time-sampled data. *Molecular*  
779 *Ecology Resources*, **15**, 87–98.
- 780 Fox CW, Messina FJ (2018) Evolution of larval competitiveness and associated life-history  
781 traits in response to host shifts in a seed beetle. *Journal of Evolutionary Biology*, **31**,  
782 302–313.
- 783 Gnerre S, MacCallum I, Przybylski D, *et al.* (2011) High-quality draft assemblies of mam-  
784 malian genomes from massively parallel sequence data. *Proceedings of the National*  
785 *Academy of Sciences*, **108**, 1513–1518.
- 786 Gompert Z (2016) Bayesian inference of selection in a heterogeneous environment from ge-  
787 netic time-series data. *Molecular Ecology*, **25**, 121–134.
- 788 Gompert Z, Comeault AA, Farkas TE, *et al.* (2014a) Experimental evidence for ecological  
789 selection on genome variation in the wild. *Ecology Letters*, **17**, 369–379.



- 790 Gompert Z, Egan SP, Barrett RD, Feder JL, Nosil P (2017) Multilocus approaches for the  
791 measurement of selection on correlated genetic loci. *Molecular Ecology*, **26**, 365–382.
- 792 Gompert Z, Lucas LK, Buerkle CA, Forister ML, Fordyce JA, Nice CC (2014b) Admixture  
793 and the organization of genetic diversity in a butterfly species complex revealed through  
794 common and rare genetic variants. *Molecular Ecology*, **23**, 4555–4573.
- 795 Gompert Z, Lucas LK, Nice CC, Fordyce JA, Forister ML, Buerkle CA (2012) Genomic  
796 regions with a history of divergent selection affect fitness of hybrids between two butterfly  
797 species. *Evolution*, **66**, 2167–2181.
- 798 Gompert Z, Messina FJ (2016) Genomic evidence that resource-based trade-offs limit host-  
799 range expansion in a seed beetle. *Evolution*, **70**, 1249–1264.
- 800 Gomulkiewicz R, Holt RD (1995) When does evolution by natural selection prevent extinc-  
801 tion? *Evolution*, **49**, 201–207.
- 802 Gonzalez A, Bell G (2013) Evolutionary rescue and adaptation to abrupt environmental  
803 change depends upon the history of stress. *Philosophical Transactions of the Royal Society*  
804 *B*, **368**, 20120079.
- 805 Gonzalez A, Ronce O, Ferriere R, Hochberg ME (2013) Evolutionary rescue: an emerging  
806 focus at the intersection between ecology and evolution. *Philosophical Transactions of the*  
807 *Royal Society of London B*, **368:20120404**.
- 808 Gough B (2009) *GNU Scientific Library Reference Manual*. 3rd edn., Network Theory Ltd.
- 809 Grant PR, Grant BR (2002) Unpredictable evolution in a 30-year study of Darwin’s finches.  
810 *Science*, **296**, 707–711.
- 811 Graves Jr J, Hertweck K, Phillips M, *et al.* (2017) Genomics of parallel experimental evolution  
812 in *Drosophila*. *Molecular Biology and Evolution*, **34**, 831–842.

- 813 Hendry AP (2016) *Eco-evolutionary Dynamics*. Princeton University Press.
- 814 Hermisson J, Pennings PS (2005) Soft sweeps: molecular population genetics of adaptation  
815 from standing genetic variation. *Genetics*, **169**, 2335–2352.
- 816 Hopkins R, Rausher MD (2012) Pollinator-mediated selection on flower color allele drives  
817 reinforcement. *Science*, **335**, 1090–1092.
- 818 Hotzy C, Arnqvist G (2009) Sperm competition favors harmful males in seed beetles. *Current*  
819 *Biology*, **19**, 404–407.
- 820 Jones FC, Grabherr MG, Chan YF, *et al.* (2012) The genomic basis of adaptive evolution in  
821 threespine sticklebacks. *Nature*, **484**, 55.
- 822 Jorde PE, Ryman N (2007) Unbiased estimator for genetic drift and effective population  
823 size. *Genetics*, **177**, 927–935.
- 824 Kawecki TJ (2008) Adaptation to marginal habitats. *Annual Review of Ecology, Evolution,*  
825 *and Systematics*, **39**, 321–342.
- 826 Killeen J, Gougat-Barbera C, Krenek S, Kaltz O (2017) Evolutionary rescue and local adap-  
827 tation under different rates of temperature increase: a combined analysis of changes in  
828 phenotype expression and genotype frequency in *Paramecium* microcosms. *Molecular Ecol-*  
829 *ogy*, **26**, 1734–1746.
- 830 Kreiner JM, Stinchcombe JR, Wright SI (2017) Population genomics of herbicide resistance:  
831 Adaptation via evolutionary rescue. *Annual Review of Plant Biology*, **69**, 611–635.
- 832 Lagator M, Colegrave N, Neve P (2014) Selection history and epistatic interactions impact  
833 dynamics of adaptation to novel environmental stresses. *Proceedings of the Royal Society*  
834 *of London B: Biological Sciences*, **281**, 20141679.
- 835 Langfelder P, Zhang B, Horvath S (2016) *dynamicTreeCut: Methods for Detection of Clusters*  
836 *in Hierarchical Clustering Dendrograms*. R package version 1.63-1.

- 837 Lenski RE, Rose MR, Simpson SC, Tadler SC (1991) Long-term experimental evolution in  
838 *Escherichia coli*. i. adaptation and divergence during 2,000 generations. *The American*  
839 *Naturalist*, **138**, 1315–1341.
- 840 Lescak EA, Bassham SL, Catchen J, *et al.* (2015) Evolution of stickleback in 50 years on  
841 earthquake-uplifted islands. *Proceedings of the National Academy of Sciences*, **112**, E7204–  
842 E7212.
- 843 Li H (2011) A statistical framework for SNP calling, mutation discovery, association mapping  
844 and population genetical parameter estimation from sequencing data. *Bioinformatics*, **27**,  
845 2987–2993.
- 846 Li H, Durbin R (2009) Fast and accurate short read alignment with burrows–wheeler trans-  
847 form. *Bioinformatics*, **25**, 1754–1760.
- 848 Lindsey HA, Gallie J, Taylor S, Kerr B (2013) Evolutionary rescue from extinction is con-  
849 tingent on a lower rate of environmental change. *Nature*, **494**, 463.
- 850 Linnen CR, Poh YP, Peterson BK, *et al.* (2013) Adaptive evolution of multiple traits through  
851 multiple mutations at a single gene. *Science*, **339**, 1312–1316.
- 852 McKenzie JA, Batterham P (1994) The genetic, molecular and phenotypic consequences of  
853 selection for insecticide resistance. *Trends in Ecology & Evolution*, **9**, 166–169.
- 854 Messer PW, Ellner SP, Hairston Jr NG (2016) Can population genetics adapt to rapid  
855 evolution? *Trends in Genetics*, **32**, 408–418.
- 856 Messina FJ (1991) Life-history variation in a seed beetle: adult egg-laying vs. larval com-  
857 petitive ability. *Oecologia*, **85**, 447–455.
- 858 Messina FJ, Durham SL (2015) Loss of adaptation following reversion suggests trade-offs in  
859 host use by a seed beetle. *Journal of Evolutionary Biology*, **28**, 1882–1891.

- 860 Messina FJ, Jones JC (2011) Inheritance of traits mediating a major host shift by a seed  
861 beetle, *Callosobruchus maculatus* (Coleoptera: Chrysomelidae: Bruchinae). *Annals of the*  
862 *Entomological Society of America*, **104**, 808–815.
- 863 Messina FJ, Jones JC, Mendenhall M, Muller A (2009a) Genetic modification of host accep-  
864 tance by a seed beetle, *Callosobruchus maculatus* (Coleoptera: Bruchidae). *Annals of the*  
865 *Entomological Society of America*, **102**, 181–188.
- 866 Messina FJ, Lish AM, Gompert Z (2018) Variable responses to novel hosts by populations  
867 of the seed beetle *Callosobruchus maculatus* (Coleoptera: Chrysomelidae: Bruchinae).  
868 *Environmental Entomology*, **47**, 1194–1202.
- 869 Messina FJ, Mendenhall M, Jones JC (2009b) An experimentally induced host shift in a  
870 seed beetle. *Entomologia Experimentalis et Applicata*, **132**, 39–49.
- 871 Michalak P, Kang L, Schou MF, Garner HR, Loeschcke V (2018) Genomic signatures of  
872 experimental adaptive radiation in *Drosophila*. *Molecular Ecology*.
- 873 Mitchell R (1991) The traits of a biotype of *Callosobruchus maculatus* (F.)(Coleoptera:  
874 Bruchidae) from South India. *Journal of Stored Products Research*, **27**, 221–224.
- 875 Müllner D, *et al.* (2013) fastcluster: Fast hierarchical, agglomerative clustering routines for  
876 R and Python. *Journal of Statistical Software*, **53**, 1–18.
- 877 Nosil P, Villoutreix R, de Carvalho CF, *et al.* (2018) Natural selection and the predictability  
878 of evolution in *Timema* stick insects. *Science*, **359**, 765–770.
- 879 Ono J, Gerstein AC, Otto SP (2017) Widespread genetic incompatibilities between first-step  
880 mutations during parallel adaptation of *Saccharomyces cerevisiae* to a common environ-  
881 ment. *PLoS Biology*, **15**, e1002591.

- 882 Orozco-terWengel P, Kapun M, Nolte V, Kofler R, Flatt T, Schlötterer C (2012) Adapta-  
883 tion of *Drosophila* to a novel laboratory environment reveals temporally heterogeneous  
884 trajectories of selected alleles. *Molecular Ecology*, **21**, 4931–4941.
- 885 Orr HA (1998) The population genetics of adaptation: the distribution of factors fixed during  
886 adaptive evolution. *Evolution*, **52**, 935–949.
- 887 Orr HA (2005) The genetic theory of adaptation: a brief history. *Nature Reviews Genetics*,  
888 **6**, 119–127.
- 889 Orr HA, Unckless RL (2014) The population genetics of evolutionary rescue. *PLoS Genetics*,  
890 **10**, e1004551.
- 891 Palumbi SR (2001) Humans as the world’s greatest evolutionary force. *Science*, **293**, 1786–  
892 1790.
- 893 Ramsayer J, Kaltz O, Hochberg ME (2013) Evolutionary rescue in populations of *Pseu-*  
894 *domonas fluorescens* across an antibiotic gradient. *Evolutionary Applications*, **6**, 608–616.
- 895 Rego-Costa A, Debarre F, Chevin LM (2018) Chaos and the (un) predictability of evolution  
896 in a changing environment. *Evolution*, **72**, 375–385.
- 897 Rudman SM, Barbour MA, Csilléry K, *et al.* (2018) What genomic data can reveal about  
898 eco-evolutionary dynamics. *Nature Ecology & Evolution*, **2**, 9–15.
- 899 Seabra SG, Fragata I, Antunes MA, *et al.* (2017) Different genomic changes underlie adaptive  
900 evolution in populations of contrasting history. *Molecular Biology and Evolution*, **35**, 549–  
901 563.
- 902 Steiner CC, Weber JN, Hoekstra HE (2007) Adaptive variation in beach mice produced by  
903 two interacting pigmentation genes. *PLoS Biology*, **5**, e219.
- 904 Steinhauer D, Holland J (1987) Rapid evolution of RNA viruses. *Annual Reviews in Micro-*  
905 *biology*, **41**, 409–431.

- 906 Stuart YE, Campbell T, Hohenlohe P, Reynolds RG, Revell L, Losos J (2014) Rapid evolution  
907 of a native species following invasion by a congener. *Science*, **346**, 463–466.
- 908 Thompson JN (2013) *Relentless Evolution*. University of Chicago Press.
- 909 Tinghitella R, Zuk M, Beveridge M, Simmons L (2011) Island hopping introduces polynesian  
910 field crickets to novel environments, genetic bottlenecks and rapid evolution. *Journal of*  
911 *Evolutionary Biology*, **24**, 1199–1211.
- 912 Tobler R, Franssen SU, Kofler R, *et al.* (2014) Massive habitat-specific genomic response in  
913 *D. melanogaster* populations during experimental evolution in hot and cold environments.  
914 *Molecular Biology and Evolution*, **31**, 364–375.
- 915 Tuda M, Kagoshima K, Toquenaga Y, Arnqvist G (2014) Global genetic differentiation in  
916 a cosmopolitan pest of stored beans: effects of geography, host-plant usage and anthro-  
917 pogenic factors. *PLoS One*, **9**, e106268.
- 918 Tuda M, Rönn J, Buranapanichpan S, Wasano N, Arnqvist G (2006) Evolutionary diversifi-  
919 cation of the bean beetle genus *Callosobruchus* (Coleoptera: Bruchidae): traits associated  
920 with stored-product pest status. *Molecular Ecology*, **15**, 3541–3551.
- 921 Vander Wal E, Garant D, Festa-Bianchet M, Pelletier F (2013) Evolutionary rescue in ver-  
922 tebrates: evidence, applications and uncertainty. *Philosophical Transactions of the Royal*  
923 *Society B*, **368**, 20120090.
- 924 Vonlanthen P, Bittner D, Hudson AG, *et al.* (2012) Eutrophication causes speciation reversal  
925 in whitefish adaptive radiations. *Nature*, **482**, 357.
- 926 Wilson BA, Pennings PS, Petrov DA (2017) Soft selective sweeps in evolutionary rescue.  
927 *Genetics*, **205**, 1573–1586.
- 928 Yoshida T, Jones LE, Ellner SP, Fussmann GF, Hairston Jr NG (2003) Rapid evolution  
929 drives ecological dynamics in a predator–prey system. *Nature*, **424**, 303.

## 930 **Author Contributions**

931 ZG and FJM conceived and designed the study. FJM ran the selection experiment. ZG  
932 generated the DNA sequence data. AR and ZG analyzed the data. ZG, AR and FJM wrote  
933 and revised the manuscript.

## 934 **Data Accessibility**

935 DNA sequence reads are available from NCBI's SRA (BioProject number PRJNA480050).  
936 Other data and computer code used to analyze these data are available from DRYAD  
937 ([doi:10.5061/dryad.0tr36fp](https://doi.org/10.5061/dryad.0tr36fp)).

## 938 Tables and Figures

Table 1: Bayesian estimates of variance effective population sizes ( $N_e$ ) for different sublines and time periods. ETPI = equal-tail probability interval.

| Time period | $N_e$ (median) | $N_e$ (95% ETPIs) |
|-------------|----------------|-------------------|
| P-F4        | 8.82           | 8.60–9.04         |
| F4-F16A     | 68.84          | 66.69–71.05       |
| F4-F16B     | 56.77          | 55.24–58.35       |
| P-F16A      | 28.69          | 28.00–29.34       |
| P-F16B      | 27.25          | 26.68–27.91       |



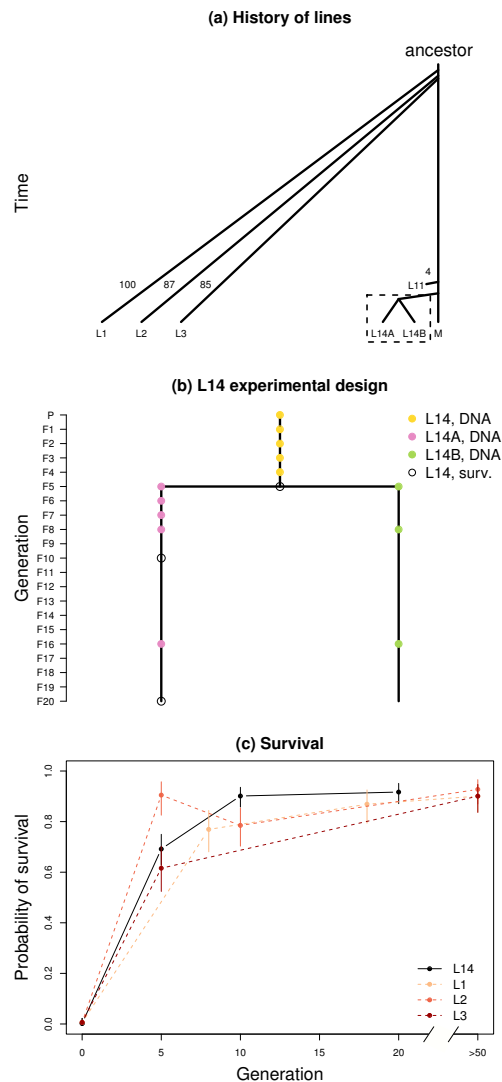

Figure 1: Experimental design. Panel (a) illustrates the history of all lentil lines discussed in this manuscript (i.e., L1, L2, L3, L11 and L14) along with the south Indian mung line (denoted M). The number of generations that elapsed between the origin of each line and when it was sampled for population genomic analyses is shown for L1, L2, L3 and L11. Details for L14 (denoted by the box) are shown in panel (b). The L14 lentil line was established from an Indian mung bean line. At the F5 generation, L14 was split into sublines A and B. Samples were taken for genetic analysis every generation up to F4 (yellow dots), and then in subline A in the F5–F8, and F16 generations (pink dots), and subline B in the F5, F8, and F16 generations (green dots). Open black circles denote generations in which fitness was assayed. Bayesian estimates of survival on lentil are shown in panel (c). Survival was measured at generations L14–F5, L14A–F10, L14A–F20, and in the Indian mung bean line, which is shown as generation 0. Data for L1, L2, and L3 come from Messina *et al.* (2009b) and Messina & Durham (2015). Points and vertical lines denote posterior medians and 95% equal-tail probability intervals.

1. Sample 1 of the 3 models (constrained vs. unconstrained)

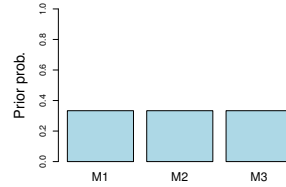

2. Draw  $s$  and  $h$  from their prior distributions

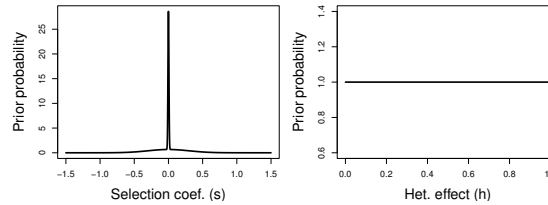

3. Simulate evolution with drift and selection given  $s$  and  $h$

$$p^* = p_t + \frac{p_t^2 w_{11} + p_t(1-p_t)w_{12} - p_t \bar{w}}{\bar{w}}$$

$$p_{t+1} \sim \text{binomial}(p^*, 2N_e) / 2N_e$$

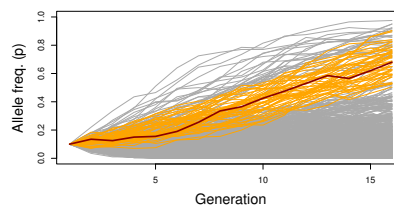

4. Generate posteriors from the subset of sims. that best match the observed data

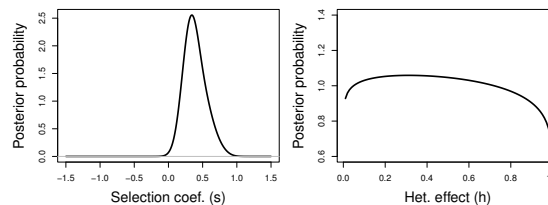

Figure 2: Diagram summarizing the ABC methods used. For each SNP and ABC simulation, we sampled one of the three models of constraint (step 1) and values of  $s$  (selection) and  $h$  (heterozygote effect) based on their prior probabilities (step 2). Depending on the model, the same values of  $s$  and  $h$  were used across generations or sublines, or different values were sampled for early versus later generations or for different sublines. We repeated this process five million times (per SNP), and each time we simulated evolution under the Wright-Fisher model with selection given the sampled values of  $s$  and  $h$  (and our estimates of  $N_e$ ) (step 3). Here, the first equation gives the expected value of the allele frequency in generation  $t + 1$  (denoted  $p^*$ ) based on the current allele frequency ( $p_t$ ) and fitness values (which are determined by  $s$  and  $h$ ). The second equation denotes the stochastic component of the Wright-Fisher model, which involves random sampling (drift) around the expected value. The graph below the equations shows 5000 evolutionary trajectories. Orange lines denote the subset that best matched hypothetical observed data for a SNP (shown in red). Values of  $s$  and  $h$  from the subset of simulations that best fit (match) the observed allele frequency trajectory are retained and form the basis of the posterior distribution (following correction by local linear regression) (step 4).

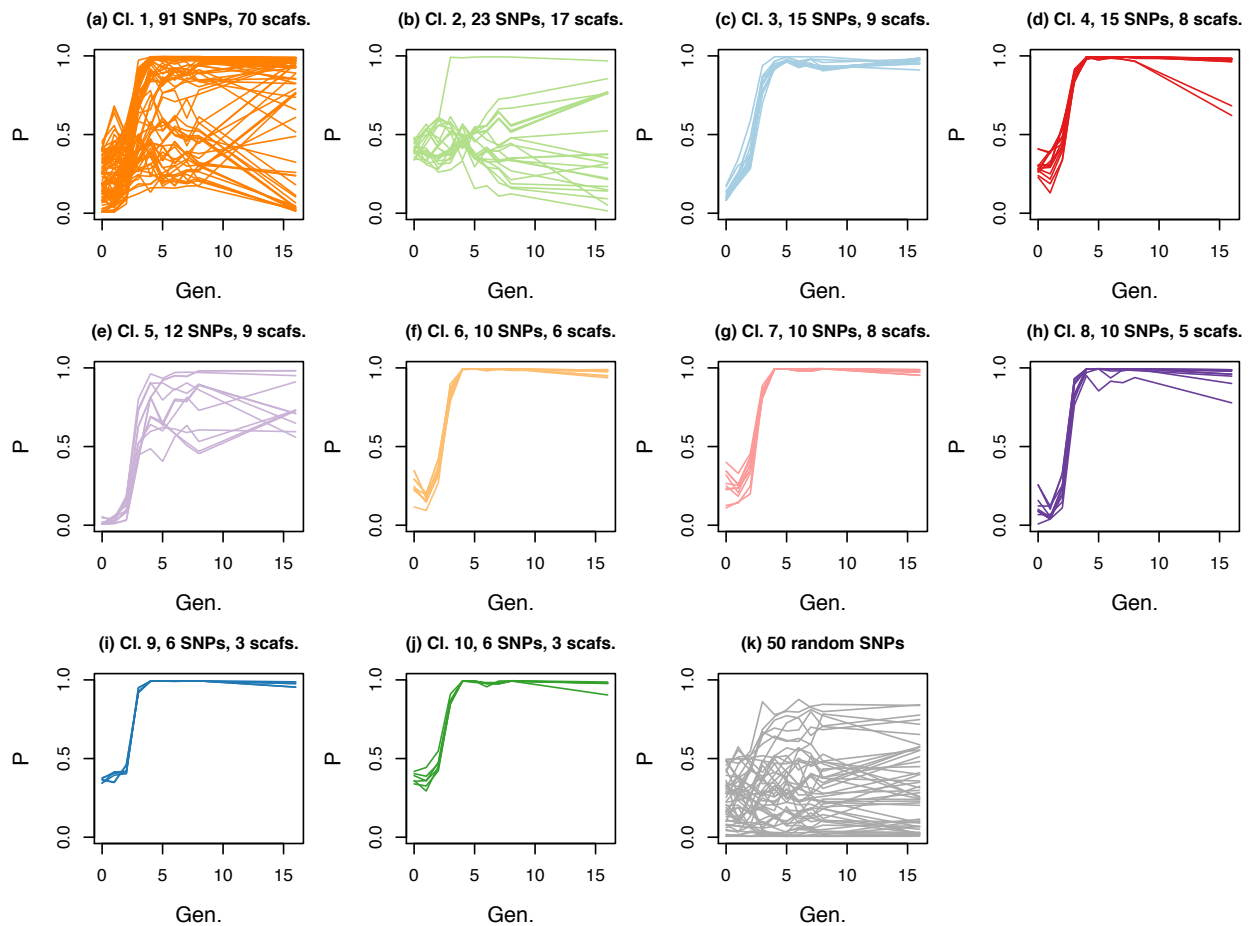

Figure 3: Patterns of allele frequency change for L14 subline A (L14A). Panels (a)–(j) show allele frequency ( $P$ ) over time (Gen. = generation) for the 198 focal SNPs. Each line shows the allele frequency trajectory for a single SNP and these are organized into panels by the LD clusters delineated in the F1 generation (Cl. = cluster number; see Fig. 4 and the main text for details). Colors correspond with those from L14–F1 in Fig. 4(a). The number of SNPs and number in each panel and number of scaffolds on which they reside is given. Panel (k) shows patterns of change for 50 randomly selected SNPs. In all cases, the frequency of the minor allele from the parental generation is shown. See Fig. S8 for similar results from L14B.

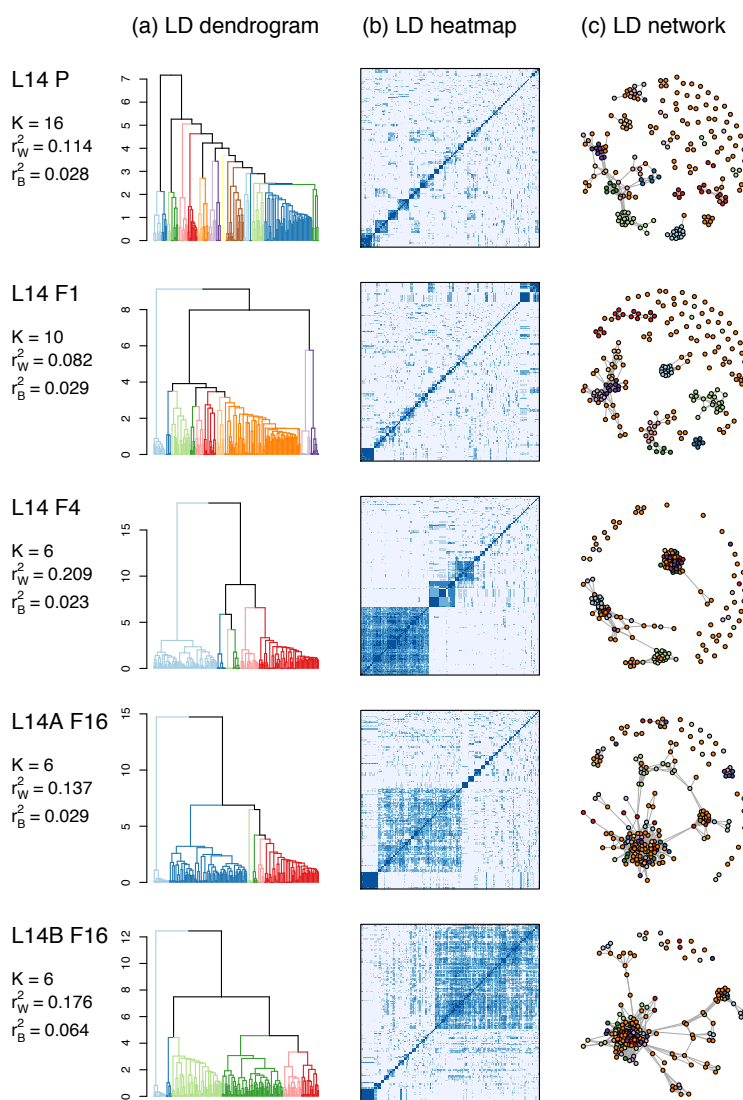

Figure 4: Patterns of LD among the 198 focal SNPs for L14-P, L14-F1, L14-F4, L14A-F16 and L14B-F16. Panel (a) shows dendrograms from hierarchical clustering of SNPs based on LD, with colors denoting clusters delineated with the `cutreeDynamic` function (colors do not track clusters across generations). The number of clusters ( $K$ ) and mean LD for SNPs in the same ( $r_W^2$ ) versus different ( $r_B^2$ ) clusters are given. The corresponding pairwise LD matrixes are shown as heat maps in panel (b) (darker shades of blue denote high LD). Panel (c) shows networks connecting SNPs (nodes = colored dots) with high LD ( $r^2 \geq 0.25$ ). Nodes are colored based on their cluster membership as defined by hierarchical clustering in the F1 generation (see panel a) (compare to Fig. S10 where, for each generation, nodes are colored based on their cluster membership in that generation).

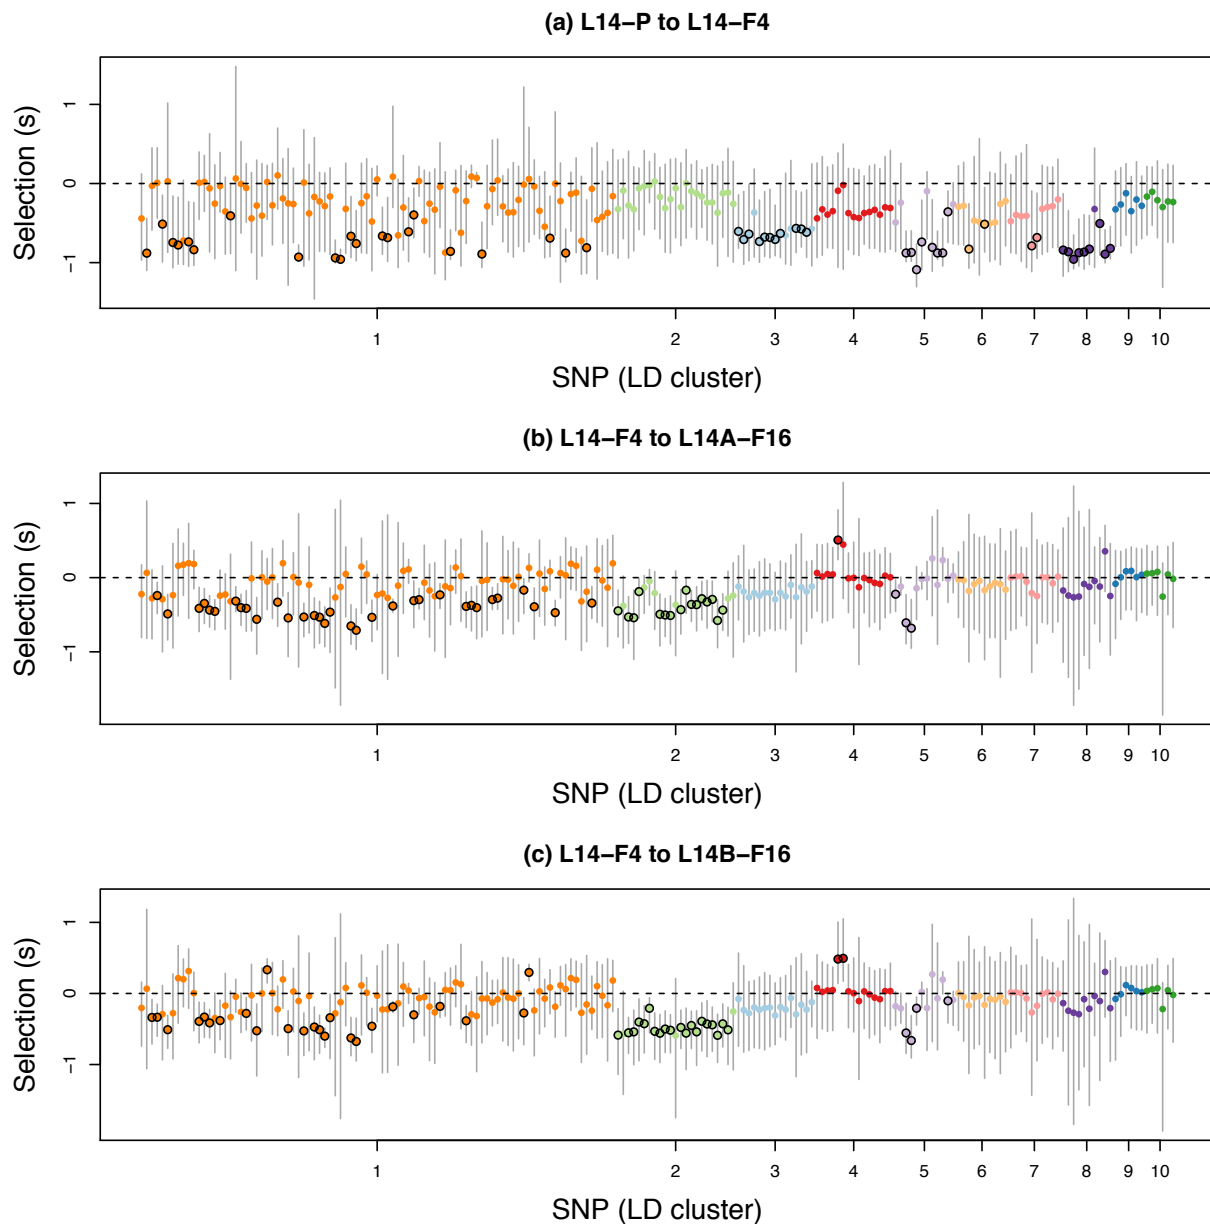

Figure 5: Plots show Bayesian estimates of selection coefficients for the 198 focal SNPs for (a) the origin of L14 through the F4 generation (L14-P to L14-F4), (b) the F4 generation to the F16 generation in subline A (L14-F4 to L14A-F16), and (c) the F4 generation to the F16 generation in subline B (L14-F4 to L14B-F16). Dots and vertical bars denote posterior medians and 95% equal-tail probability intervals (ETPIs), respectively. Colors and the order of SNPs reflect LD cluster membership in the F1 generation. Black circles around dots denote cases where the 95% ETPIs exclude 0. For the purpose of visualization, we have polarized estimates of  $s$  such that negative values indicate selection favoring the minor allele.

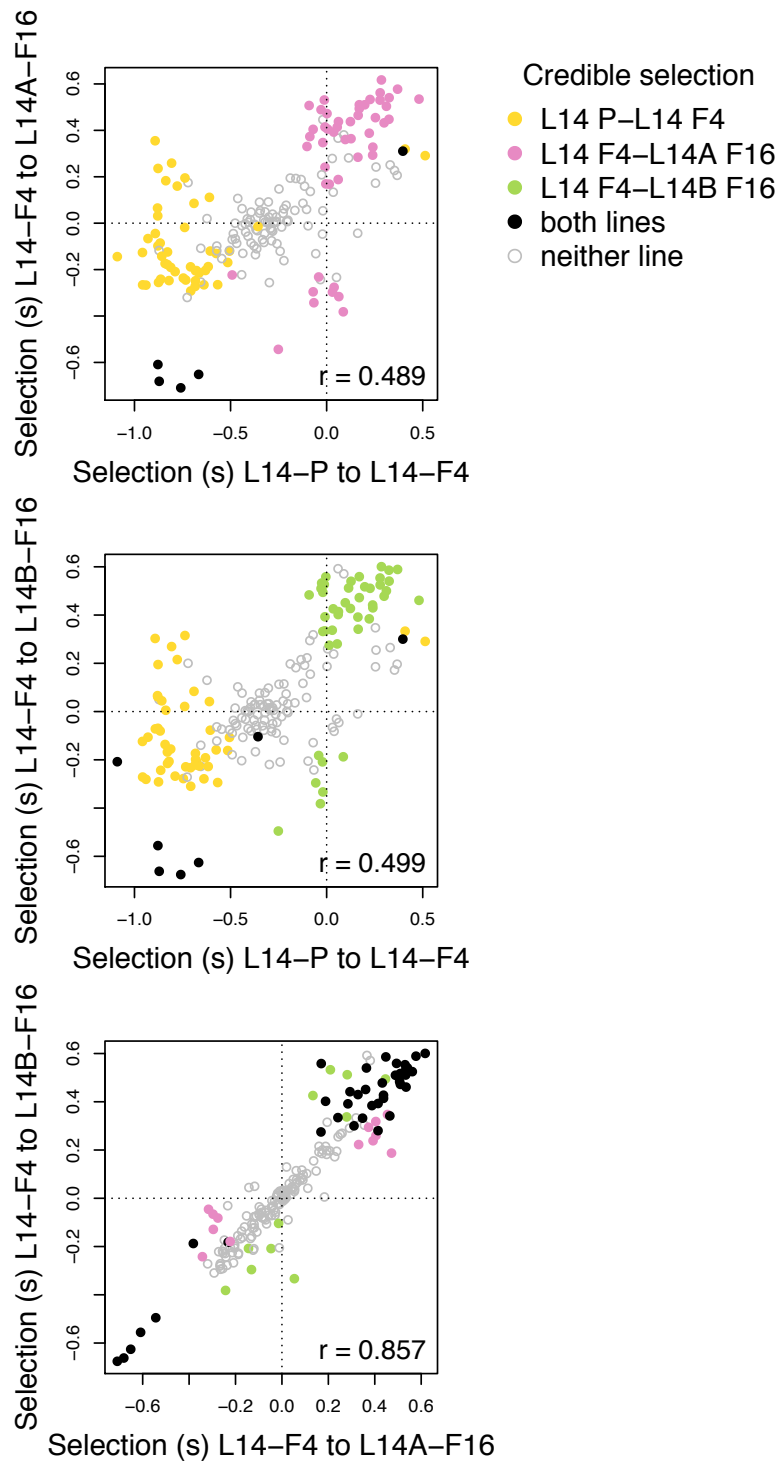

Figure 6: Scatter plots show associations between selection coefficient estimates for the 198 focal SNPs in L14 for different time intervals and sublines. Dots correspond to SNPs and are colored based on whether there was credible evidence of selection in each subline/interval. Pearson correlations account for uncertainty in estimates of selection (i.e., they are not based solely on the point estimates shown here).

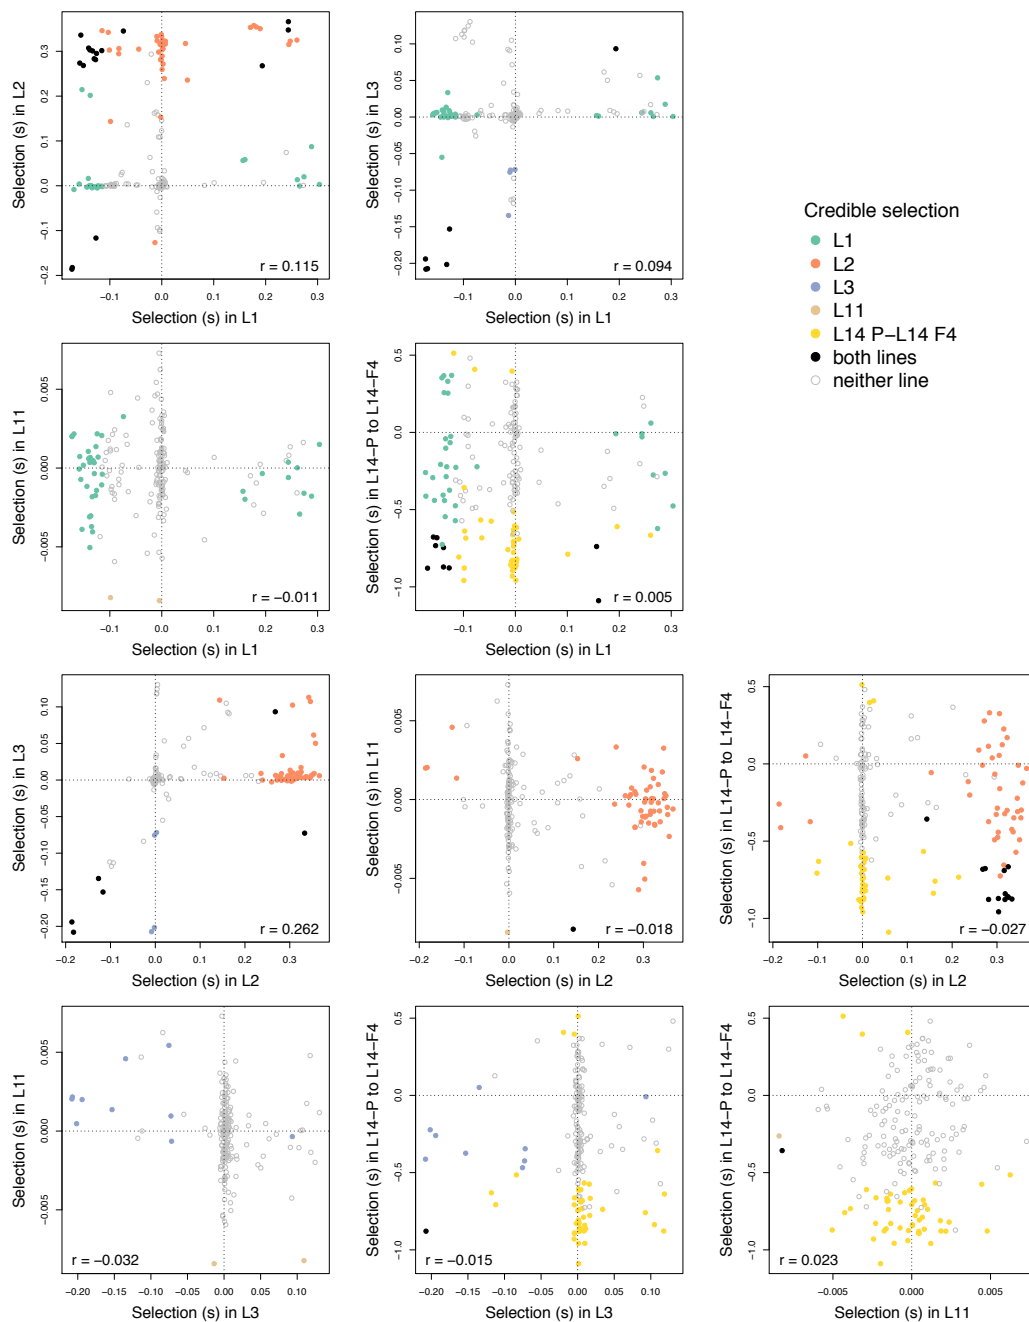

Figure 7: Scatter plots show associations between selection coefficient estimates for the focal SNPs across lines. Results are shown here for all comparisons involving the early stage of rescue in L14 versus other lines. For comparisons with lines L1, L2, and L3 the 188 SNPs present in those lines are shown (a single point for L11 was omitted for visualization as it had an extreme but not-credible estimate of  $s$ ). Dots correspond to SNPs and are colored based on whether there was credible evidence of selection in each (sub)line. Pearson correlations account for uncertainty in estimates of selection (i.e., they are not based solely on the point estimates shown here).
